# Supplementary material for: The abiotic and biotic drivers of rapid diversification in Andean bellflowers (Campanulaceae)
Source: PubMed Central journal article supplement (PMC4950005; doi:10.1111/nph.13920), 2016-03-14
Supplement: NPH-210-1430-s001.pdf [file NPH-210-1430-s001.pdf]

1 ***New Phytologist* Supporting Information**

2

3 Article title: **The abiotic and biotic drivers of rapid diversification in Andean bellflowers**  
4 **(Campanulaceae)**

5

6 Authors: Laura P. Lagomarsino, Fabien L. Condamine, Alexandre Antonelli, Andreas Mulch,  
7 Charles C. Davis

8 Article acceptance date: 26 January 2016

9

10 The following Supporting Information is available for this article:

11

12 **Fig. S1** Time-calibrated phylogeny of Neotropical Campanulaceae, with outgroup  
13 representatives of Lobelioideae and Campanuloideae collapsed.

14

15 **Fig. S2** Time-calibrated phylogeny of Neotropical Campanulaceae, with the ingroup collapsed  
16 and showing outgroup relationships.

17

18 **Fig. S3** Phylogram showing molecular-proportional branch lengths, illustrating substitution rate  
19 heterogeneity within clade.

20

21 **Fig. S4** Diversification rate analysis for Neotropical Campanulaceae in BAMM.

22

23 **Fig. S5** Posterior distributions of trait-dependent speciation (i), extinction (ii), transition (iii), and  
24 net diversification rates (iv) as estimated by BiSSE.

25

26 **Table S1** Taxon sampling including voucher information, country of origin, and GenBank  
27 accession numbers for seven plastid loci.

28

29 **Table S2** Divergence time estimation to assess sensitivity to dating method, calibration selection,  
30 and branch length heterogeneity.

31

32 **Table S3** Trait codings for the four traits used in our BiSSE analyses.

33

34 **Table S4** Paleoenvironmental-dependent diversification analyses using paleoaltimetry (a) and  
35 Cenozoic climate data (b).

36

37 **Table S5** Model comparison for the four BiSSE analyses presented in the main text.

38

39 **Table S6** Correlated evolution of binary traits using BayesTraits.

40

41 **Table S7** Model comparison for the two diversity-dependence analyses presented, with mean  
42 parameter estimates for each model.

43

44 **Figure S1 (next page). Time-calibrated phylogeny of Neotropical Campanulaceae, with**  
45 **outgroup representatives of Lobelioideae and Campanuloideae collapsed.** Phylogeny  
46 represents a maximum clade credibility tree resulting from BEAST analysis. Bars at nodes  
47 represent the 95% highest posterior density (HPD) of inferred ages. Time series below the  
48 chronogram is in Ma. Ingroup relationships shown, with outgroup clades collapsed. Red arrow  
49 marks the ingroup, the Neotropical bellflowers. Taxon names are color-coded accorded to  
50 current taxonomy: *Burmeistera* (green), *Centropogon* (yellow), *Siphocampylus* (red), *Lysipomia*  
51 (purple), and *Lobelia* section *Tupa* (light blue).

52

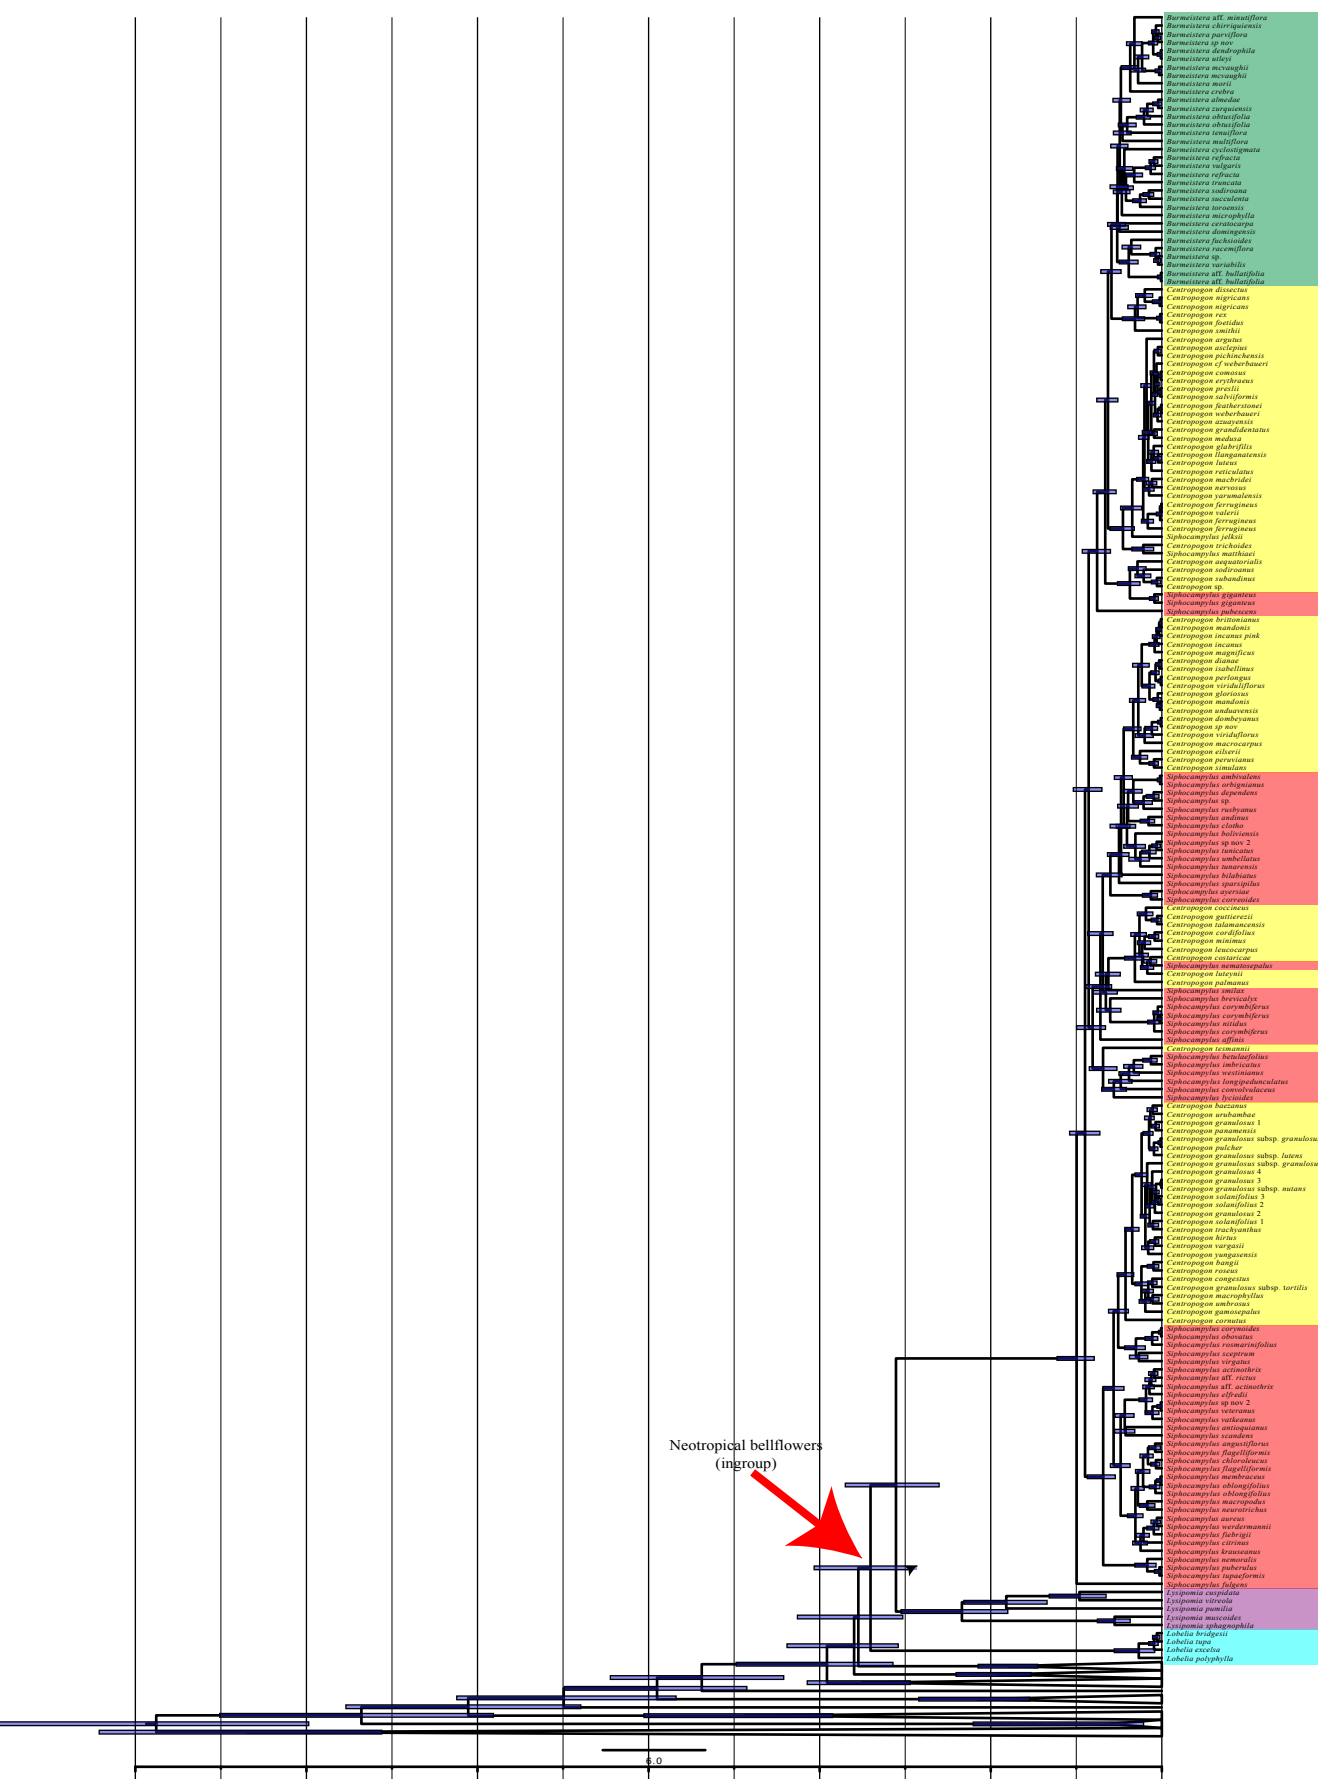

54 **Figure S2 (next page). Time-calibrated phylogeny of Neotropical Campanulaceae, with the**  
55 **ingroup collapsed and showing outgroup relationships.** Phylogeny represents a maximum  
56 clade credibility tree resulting from BEAST analysis. Bars at nodes represent the 95% highest  
57 posterior density (HPD) of inferred ages. Time series below the chronogram is in Ma. Outgroup  
58 relationships, with ingroup collapsed (in red, at top). Red arrows denote major taxonomic  
59 groups: Campanulaceae, Campanuloideae, and Lobelioideae. Numbers circled at nodes  
60 correspond to the four calibration points used to infer ages: 1) secondary age constraint for  
61 crown group Campanulaceae; 2) secondary age constraint for crown group Campanuloideae; 3)  
62 the fossil, *Campanula paleopyramidalis* at most recent common ancestor of *C. pyramidalis*  
63 Gilib. and *C. carpatica* Jacq.; and 4) the geological age constraint for the oldest island of the  
64 Hawaiian Ridge. See methods in main text for additional details.

65

66

67

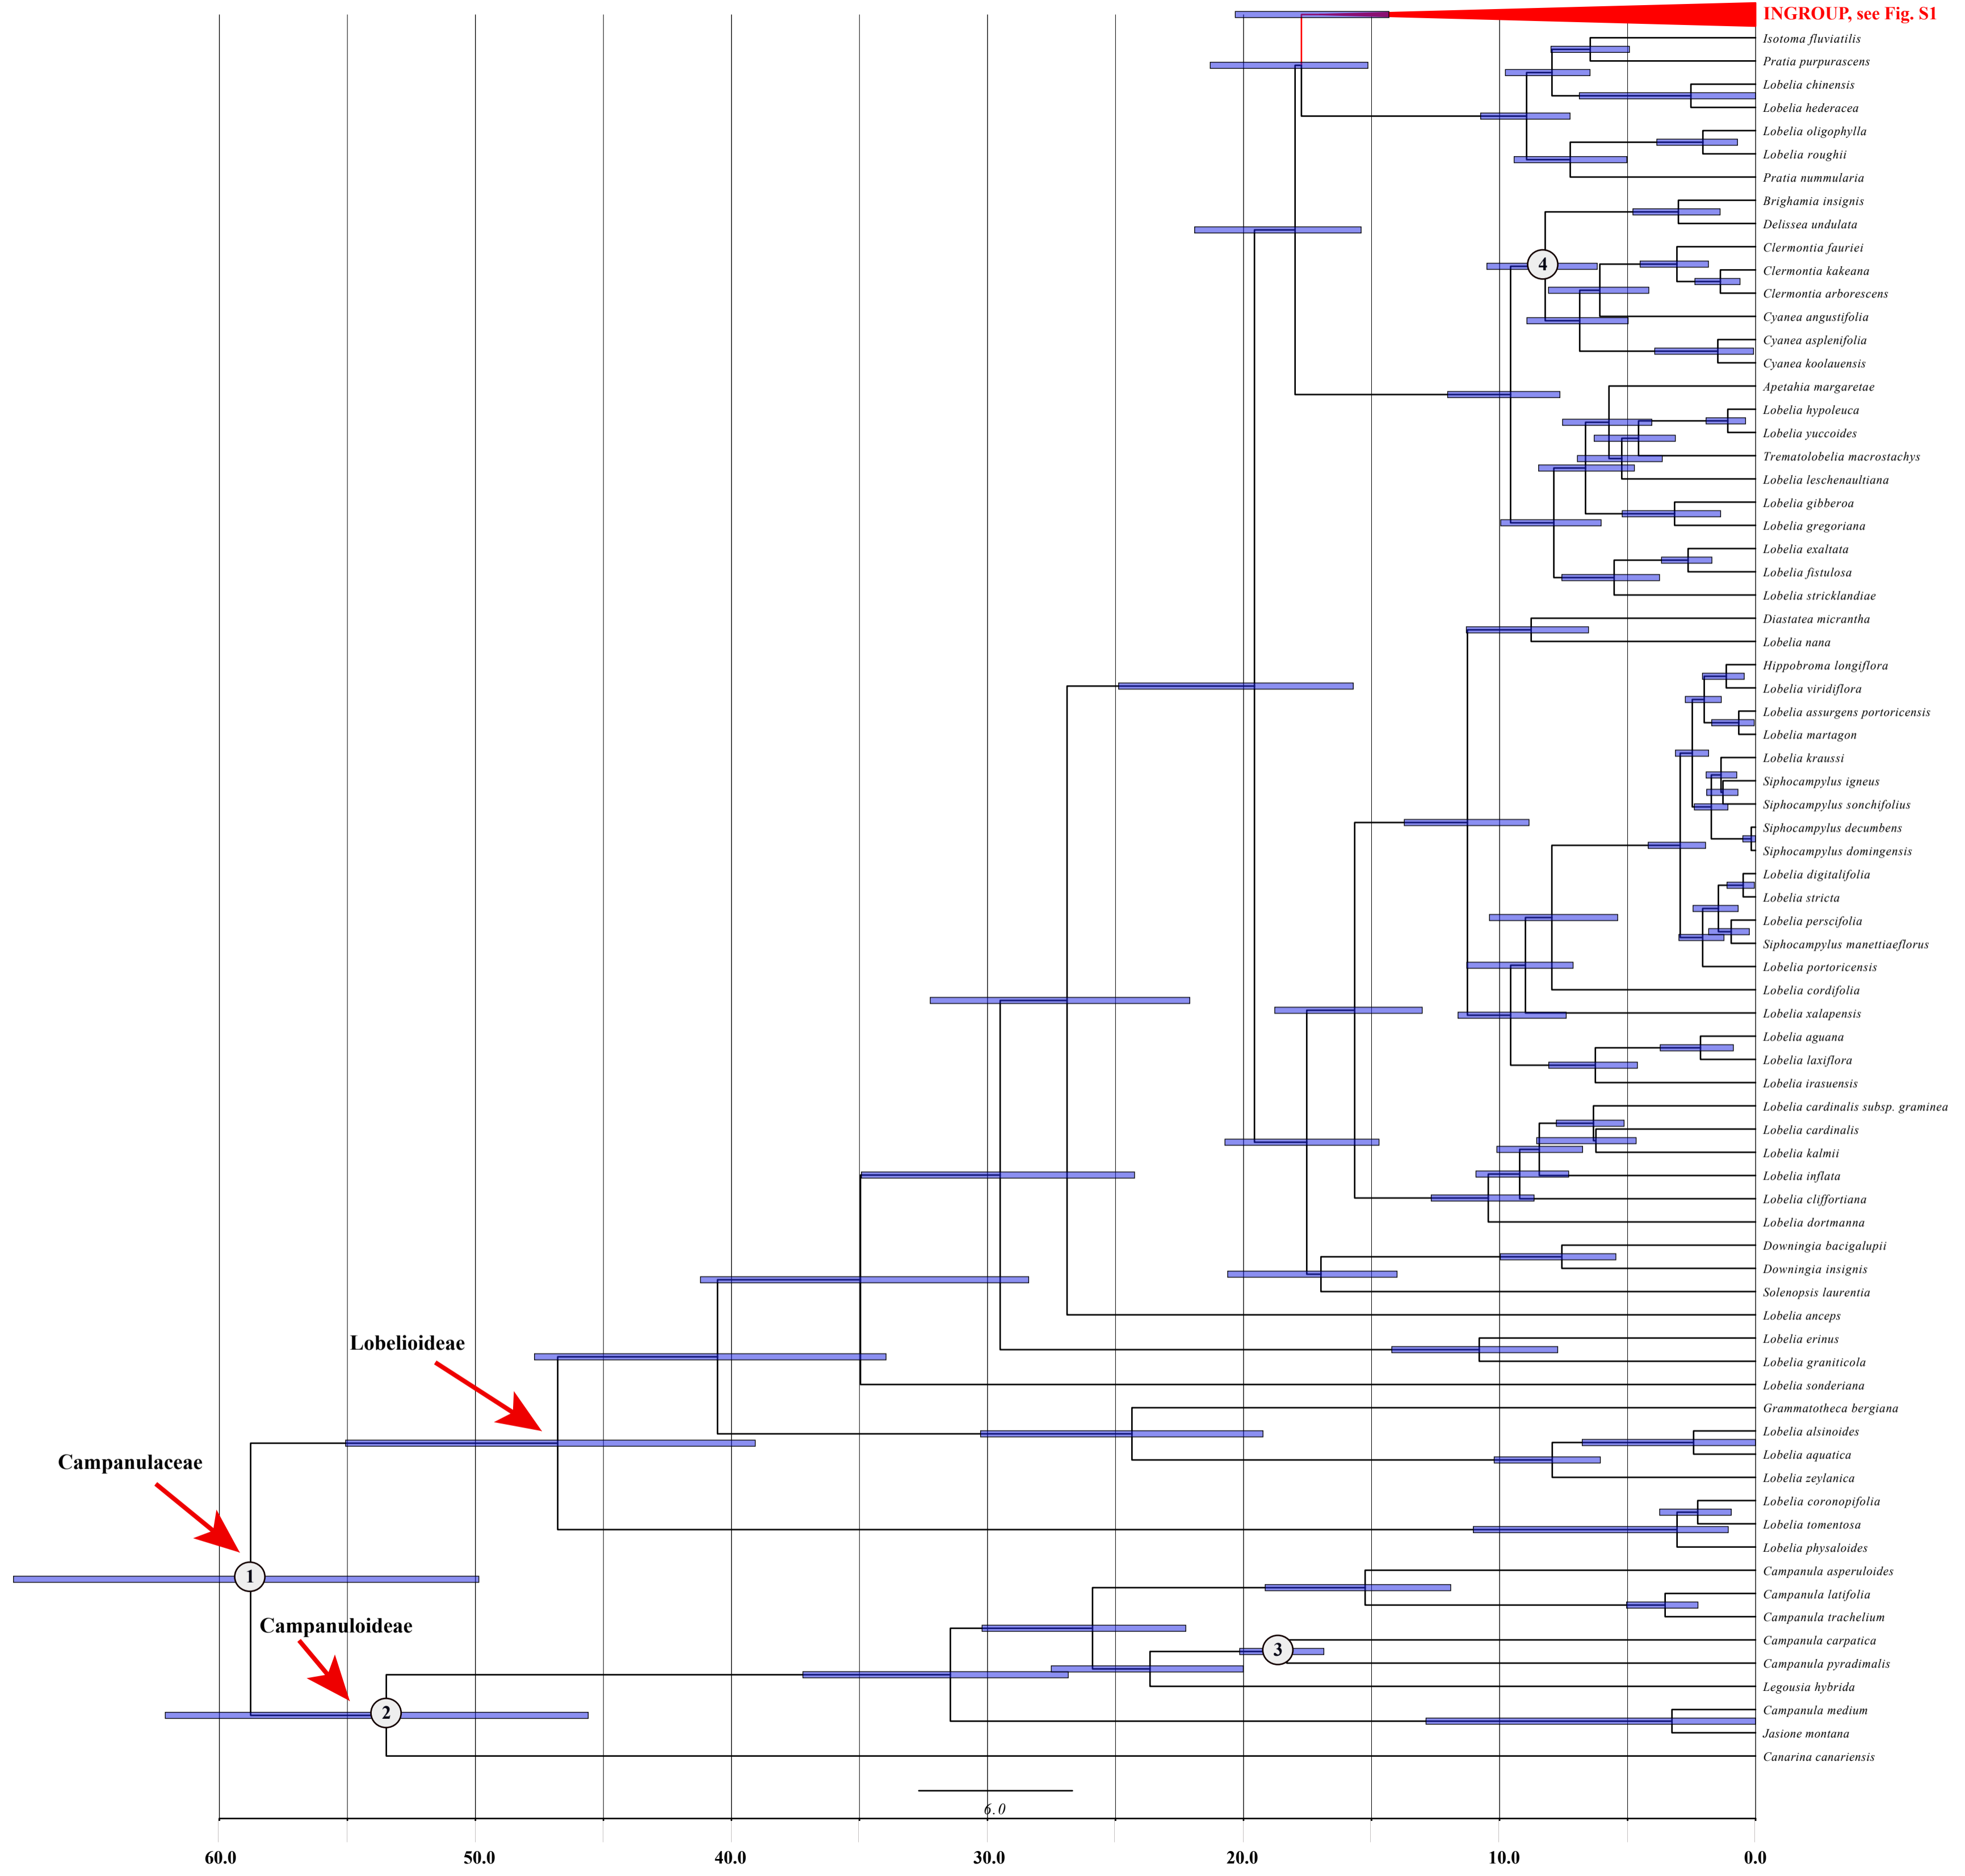

68 **Figure S3 Phylogram showing molecular-proportional branch lengths, illustrating**  
69 **substitution rate heterogeneity within clade.** Branches colored in red correspond to the  
70 centropogonid clade, in blue to *Lysipomia*, and in green to *Lobelia* section *Tupa*; black branches  
71 represent species in the outgroup. Note that the branch lengths within the genus *Lysipomia*  
72 are much longer than in other parts of the tree, reflecting an elevated substitution rate within this  
73 genus, which may result from its minute habit or the extreme high-elevation habitat to which it is  
74 endemic. The scale at bottom represents substitutions/site.  
75  
76

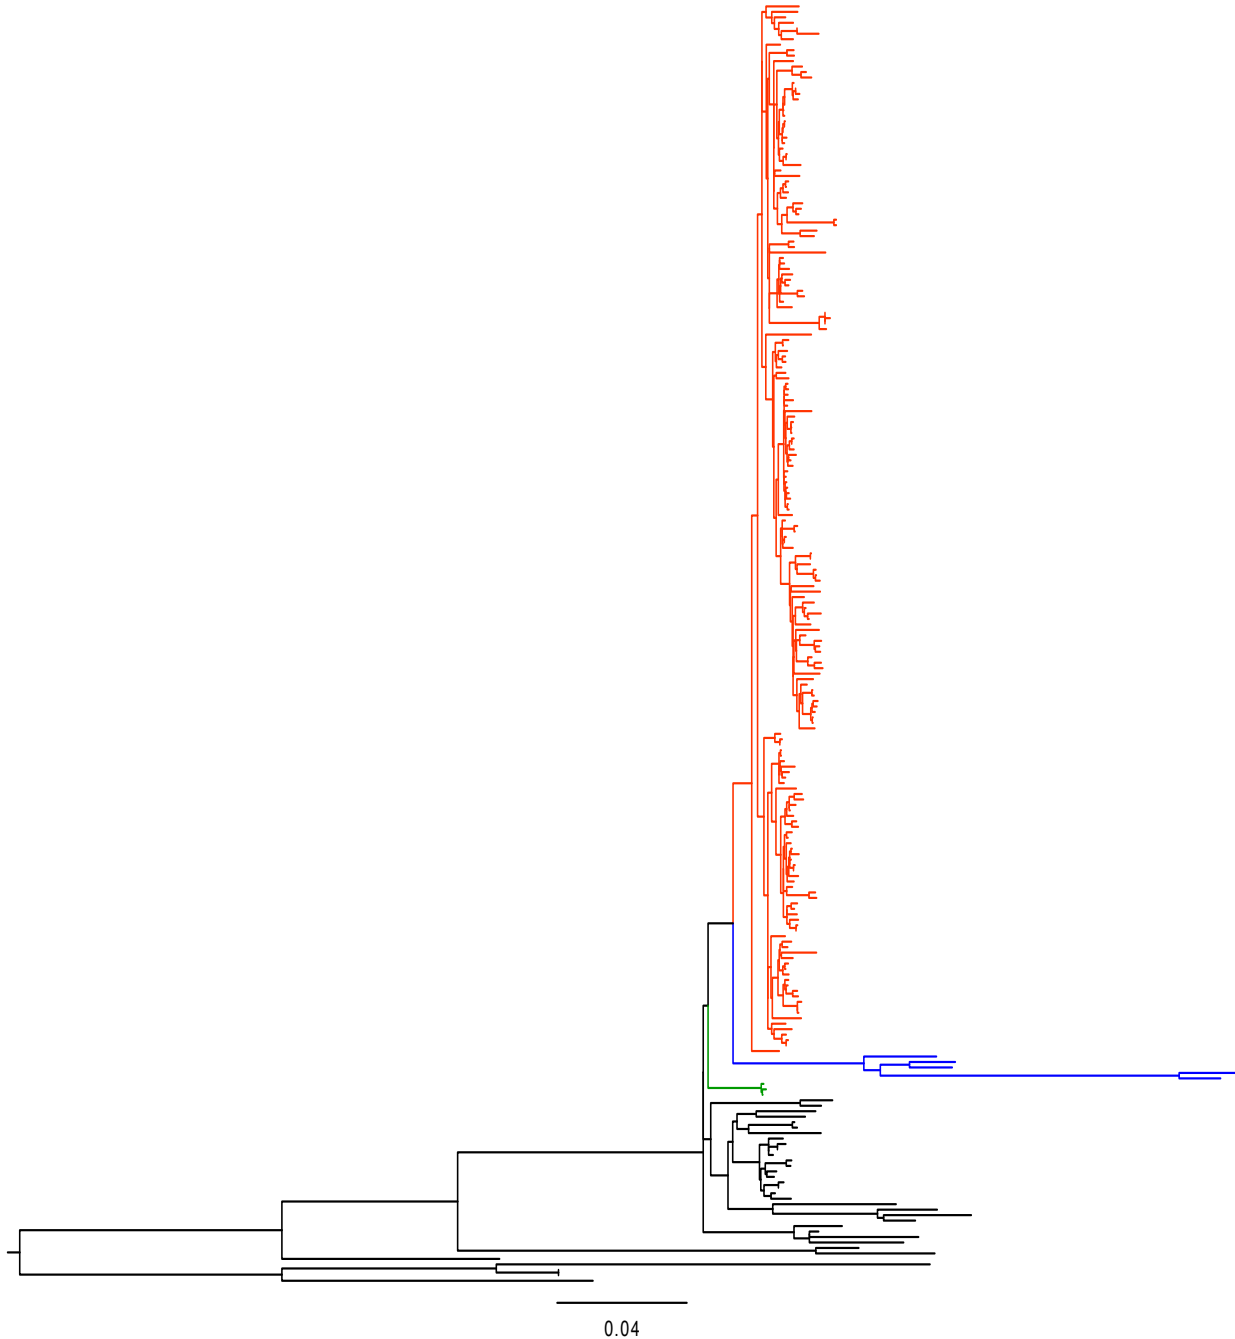

78 **Figure S4. Diversification rate analysis for Neotropical Campanulaceae in BAMM.** A. 95%  
 79 credible set of shift configurations from a BAMM analysis. Colors of branches denote  
 80 directionality and strength of rate change, cooler and warmer colors designate slower and faster  
 81 rates, respectively. Significant rate changes are designated by a circle along the branch at which  
 82 this shift takes place. Note that among the 95% credible set of shift configurations, the majority  
 83 (~67% of the shift configurations) indicate a significant increase in diversification rate at or near  
 84 the origin of the centropogonid clade. Bi–iii. Diversification rates (in events/Ma/lineage) through  
 85 time for the Neotropical bellflower clade (i), Neotropical bellflowers minus the centropogonid  
 86 clade (ii), and the centropogonid clade alone (iii). Shading in B denotes confidence interval in  
 87 rate reconstructions.

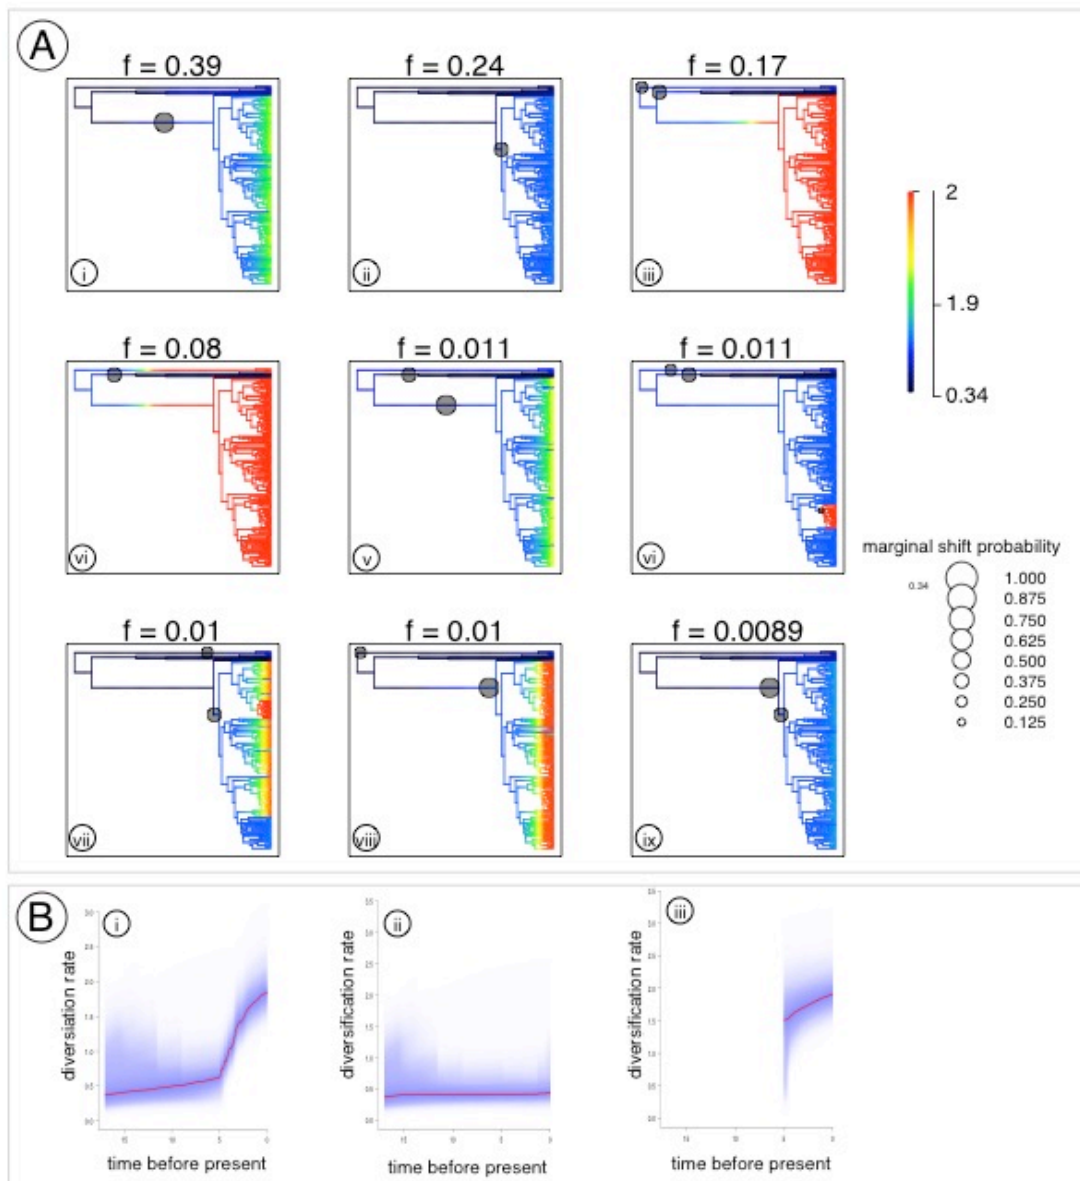



**Figure S5. Posterior distributions of trait-dependent speciation (i), extinction (ii), transition (iii), and net diversification rates (iv) as estimated by BiSSE.** Histogram colors correspond to Fig. 1 in the main text for each trait, except when the parameter is indistinguishable between the two traits (in which case it is colored gray). A. Andean vs. extra-Andean parameter estimates. B. High vs. low elevation parameter estimates. C. Dry capsule vs. fleshy berry parameter estimates. D. Vertebrate vs. invertebrate pollination parameter estimates.

## Andean v. Extra-Andean Distribution

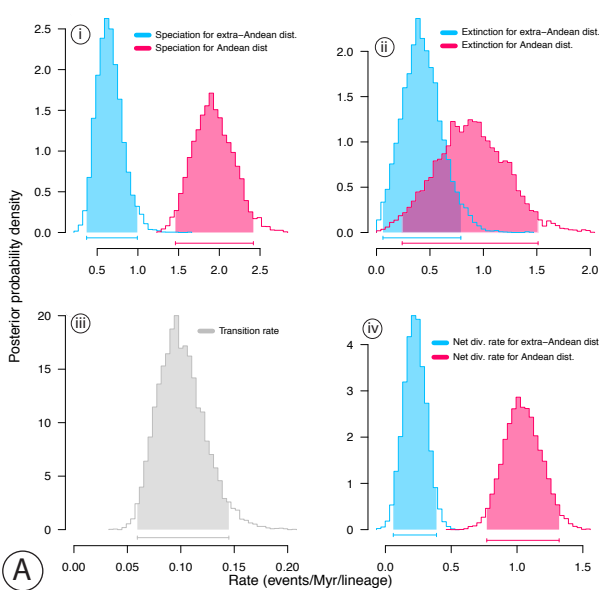

## High vs. Low Elevation

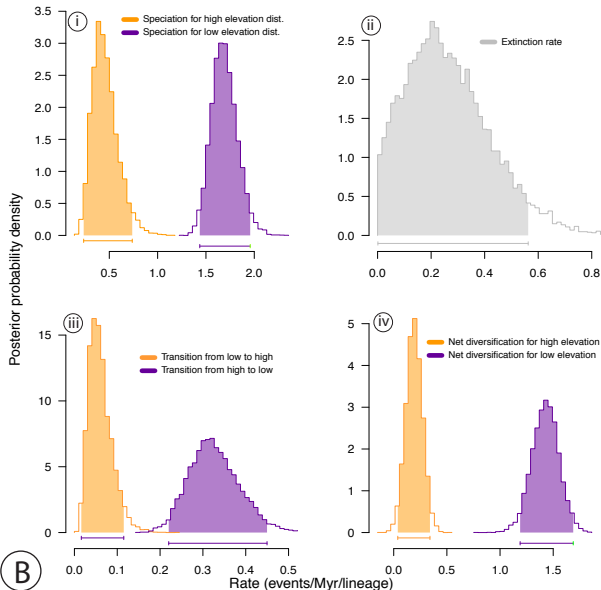

## Dry vs. Fleshy Fruit

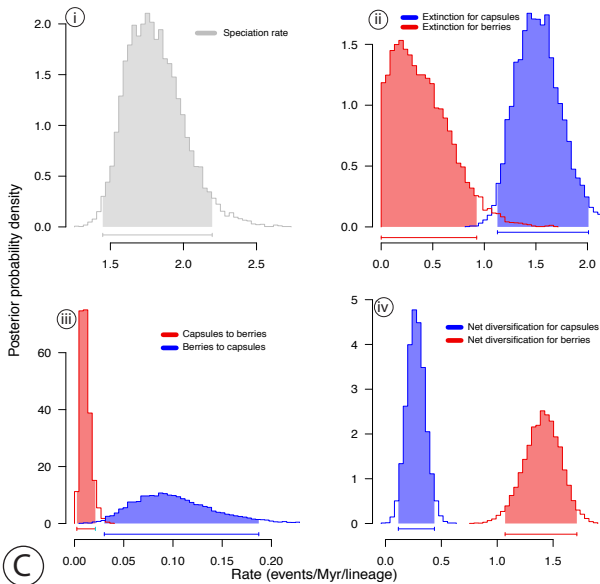

## Invertebrate vs. Vertebrate Pollination

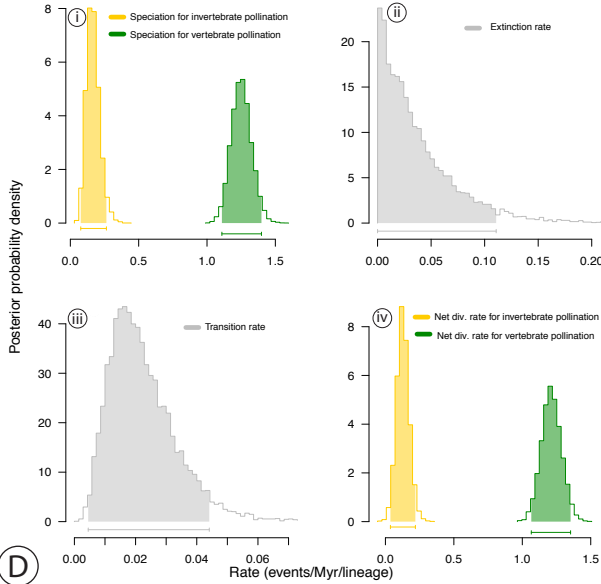

**Table S1. Taxon sampling including voucher information, country of origin, and GenBank accession numbers for seven plastid loci.**

| Taxon                                                               | Voucher                                           | Origin     | <i>rpl32-trnL</i> | <i>rpl32-ndhF</i> | <i>rps16-trnK</i> | <i>trnG-trnG-trnS</i> | <i>rbcL</i> | <i>trnL-trnF</i> | <i>ndhF</i> |
|---------------------------------------------------------------------|---------------------------------------------------|------------|-------------------|-------------------|-------------------|-----------------------|-------------|------------------|-------------|
| INGROUP                                                             |                                                   |            |                   |                   |                   |                       |             |                  |             |
| <i>Burmeistera</i>                                                  |                                                   |            |                   |                   |                   |                       |             |                  |             |
| <i>Burmeistera almedae</i> Wilbur                                   | L. Lagomarsino 86 (GH)                            | Costa Rica | KP014195          | KP014848          | KP014511          | KU670709              | -           | -                | -           |
| <i>Burmeistera</i> aff. <i>bullatifolia</i> J. Garzón & F. Gonzalez | C. D. Bacon 264A (GB)                             | Colombia   | KP014167          | KP014861          | KP014501          | KU670707              | -           | -                | -           |
| <i>Burmeistera</i> aff. <i>bullatifolia</i> J. Garzón & F. Gonzalez | C. D. Bacon 287 (GB)                              | Colombia   | KP014168          | KP014862          | KP014502          | KP014770              | -           | -                | -           |
| <i>Burmeistera ceratocarpa</i> Zahlb.                               | M. L. Bristol 993 (GH)                            | Colombia   | KP014172          | KP014852          | KP014343          | -                     | -           | -                | -           |
| <i>Burmeistera chiriquiensis</i> Wilbur                             | D. Santamaría 8996 (INB)                          | Costa Rica | KP014192          | KP014858          | KP014521          | KP014754              | -           | -                | -           |
| <i>Burmeistera crebra</i> McVaugh                                   | L. Lagomarsino 70 (GH)                            | Costa Rica | KP014234          | KP014870          | KP014507          | KP014758              | -           | -                | -           |
| <i>Burmeistera cyclostigmata</i> J. D. Smith                        | L. Lagomarsino 51 (GH); Andersson & Nilsson 2451  | Costa Rica | KP014181          | KP014876          | KP014514          | KP014707              | DQ356147    | DQ356213         | DQ356097    |
| <i>Burmeistera dendrophila</i> E. Wimm                              | L. Lagomarsino 255 (GH)                           | Panama     | KP014163          | KP014855          | KP014524          | KP014750              | -           | -                | -           |
| <i>Burmeistera domingensis</i> Jeppesen                             | N. Muchhala 102; Harling and Andersson 23154 (GB) | Ecuador    | KP014189          | KP014860          | KP014532          | KP014699              | EF174633    | DQ356210         | -           |
| <i>Burmeistera fuchsoides</i> J. Garzón & F. Gonzalez               | C. D. Bacon 258 (GB)                              | Colombia   | KP014186          | KP014865          | KP014503          | KU670692              | -           | -                | -           |
| <i>Burmeistera mcvaughii</i> Wilbur                                 | L. Lagomarsino 257 (GH)                           | Panama     | KP014166          | KP014853          | KP014526          | KP014768              | -           | -                | -           |
| <i>Burmeistera mcvaughii</i> Wilbur                                 | L. Lagomarsino 98 (GH)                            | Panama     | KP014233          | KP014854          | KP014527          | KP014769              | -           | -                | -           |

|                                                                    |                          |            |          |          |          |          |          |   |   |
|--------------------------------------------------------------------|--------------------------|------------|----------|----------|----------|----------|----------|---|---|
| <i>Burmeistera microphylla</i> J. D. Smith                         | L. Lagomarsino 34 (GH)   | Costa Rica | KP014187 | KP014850 | KP014350 | KP014720 | -        | - | - |
| <i>Burmeistera</i> aff. <i>minutiflora</i> J. Garzón & F. Gonzalez | C. D. Bacon 262 (GB)     | Colombia   | KP014235 | KP014869 | KP014508 | KP014712 | -        | - | - |
| <i>Burmeistera morii</i> Wilbur                                    | L. Lagomarsino 273 (GH)  | Panama     | KP014165 | KP014864 | KP014525 | KP014771 | -        | - | - |
| <i>Burmeistera multiflora</i> Zahlb.                               | N. Muchhala 114          | Ecuador    | KP014160 | KP014879 | KP014530 | KP014583 | -        | - | - |
| <i>Burmeistera obtusifolia</i> E. Wimm                             | L. Lagomarsino 61 (GH)   | Costa Rica | KP014197 | KP014969 | KP014510 | KU670700 | -        | - | - |
| <i>Burmeistera obtusifolia</i> E. Wimm                             | L. Lagomarsino 163 (GH)  | Panama     | KP014196 | KP014851 | KP014513 | KP014701 | -        | - | - |
| <i>Burmeistera parviflora</i> E. Wimm                              | L. Lagomarsino 53 (GH)   | Costa Rica | KP014236 | KP014859 | KP014498 | KP014752 | -        | - | - |
| <i>Burmeistera racemiflora</i> Lammers                             | M. Madison 7145 (AAU)    | Ecuador    | KP014170 | KP014845 | KP014504 | KP014760 | -        | - | - |
| <i>Burmeistera refracta</i> E. Wimm.                               | L. Andersson 2464 (GB)   | Ecuador    | KP014175 | KP014871 | KP014493 | KP014713 | -        | - | - |
| <i>Burmeistera refracta</i> E. Wimm.                               | N. Muchhala 110          | Ecuador    | KP014176 | KP014880 | KP014494 | KP014711 | -        | - | - |
| <i>Burmeistera sodiroana</i> Zahlb.                                | N. Muchhala 115          | Ecuador    | KP014239 | KP014867 | KP014528 | KU67071  | -        | - | - |
| <i>Burmeistera succulenta</i> H. Karst. & Triana                   | C. D. Bacon 297 (GB)     | Colombia   | KP014240 | KP014866 | KP014529 | KU670697 | -        | - | - |
| <i>Burmeistera tenuiflora</i> J.D. Smith                           | L. Lagomarsino 48 (GH)   | Costa Rica | KP014194 | KP014923 | -        | KP014757 | -        | - | - |
| <i>Burmeistera toroensis</i> Wilbur                                | L. Lagomarsino 92 (GH)   | Panama     | KP014241 | KP014868 | KP014497 | KP014709 | -        | - | - |
| <i>Burmeistera truncata</i> Zahlbr.                                | J. Luteyn 14362          | Ecuador    | -        | -        | KU670737 | -        | -        | - | - |
| <i>Burmeistera utleyi</i> Wilbur                                   | L. Lagomarsino 253 (GH)  | Panama     | KP014164 | KP014856 | KP014523 | KP014751 | -        | - | - |
| <i>Burmeistera variabilis</i> (Gleason) E. Wimm.                   | C. D. Bacon 298 (GB)     | Colombia   | KP014169 | KP014846 | KP014505 | KP014759 | KU670751 | - | - |
| <i>Burmeistera vulgaris</i> E. Wimm.                               | D. Santamaria S-980 (GB) | Costa Rica | KP014174 | KP014872 | KP014495 | KP014714 | -        | - | - |
| <i>Burmeistera zurquiensis</i> Wilbur                              | L. Lagomarsino 26 (GH)   | Costa Rica | KP014193 | KP014849 | KP014512 | KP014702 | KU670805 | - | - |
| <i>Burmeistera</i> sp.                                             | C. D. Bacon 283 (GB)     | Colombia   | KP014171 | KP014844 | KP014506 | KP014638 | -        | - | - |

|                                                           |                                               |            |          |          |          |          |          |          |          |
|-----------------------------------------------------------|-----------------------------------------------|------------|----------|----------|----------|----------|----------|----------|----------|
| <i>Burmeistera</i> sp. nov.                               | D. Santamaría 6640 (INB)                      | Costa Rica | KP014237 | KP014857 | KP014522 | KP014753 | -        | -        | -        |
| <b>Centropogon</b>                                        |                                               |            |          |          |          |          |          |          |          |
| <i>Centropogon aequatorialis</i> E. Wimm.                 | N. Muchhala 131                               | Ecuador    | KP014206 | KP014957 | KP014531 | KP014767 | -        | -        | -        |
| <i>Centropogon argutus</i> E. Wimm.                       | L. Lagomarsino 329                            | Peru       | KU670740 | KU670689 | KU670726 | KU670711 | KU670756 | -        | -        |
| <i>Centropogon asclepiadeus</i> (Willd.) E. Wimm.         | R. E. Weaver, Jr. 1556 (GH)                   | Colombia   | KP014228 | KP014927 | KP014560 | KU670712 | -        | -        | -        |
| <i>Centropogon azuayensis</i> Jeppesen                    | A. Antonelli 576 (GB)                         | Ecuador    | KP014231 | KP014931 | KP014558 | KU670719 | -        | -        | -        |
| <i>Centropogon baezanus</i> Jeppesen                      | N. Muchhala 162                               | Ecuador    | KP014141 | KP014836 | KP014408 | KP014624 | -        | -        | -        |
| <i>Centropogon bangii</i> Zahlb.                          | S. Beck 20763 (OSH)                           | Bolivia    | KP014122 | KP014826 | KP014409 | KP014630 | -        | -        | -        |
| <i>Centropogon brittonianus</i> Zahlb.                    | L. Lagomarsino 196 (GH)                       | Bolivia    | KP014283 | KP015004 | KP014477 | KP014686 | KU670757 | -        | -        |
| <i>Centropogon coccineus</i> (Hook.) Regel ex B.D. Jacks. | D. Santamaría 8218 (INB)                      | Costa Rica | KP014304 | KP014955 | KP014465 | KP014763 | KU670771 | -        | -        |
| <i>Centropogon comosus</i> Gleason                        | P. Nuñez 8162 (AAU)                           | Ecuador    | KP014229 | KP014937 | KP014546 | KP014739 | -        | -        | -        |
| <i>Centropogon congestus</i> Gleason                      | L. Lagomarsino 40 (GH)                        | Costa Rica | KP014127 | KP014822 | KP014406 | KP014595 | -        | -        | -        |
| <i>Centropogon cordifolius</i> Benth.                     | R. Kriebel 5559 (NY)                          | Guatemala  | KP014253 | KP014945 | KP014457 | KP014773 | -        | -        | -        |
| <i>Centropogon cornutus</i> (L.) Druce                    | L. Lagomarsino 93 (GH);<br>Jacobs et al. 4955 | Panama     | KP014121 | KP014810 | KP014345 | KP014593 | DQ356158 | DQ356226 | DQ356106 |
| <i>Centropogon costaricae</i> (Vatke) E. Wimm.            | L. Lagomarsino 24A (GH)                       | Costa Rica | KP014306 | KP014949 | KP014470 | KP014742 | KU670774 | -        | -        |
| <i>Centropogon diana</i> Lammers                          | L. Lagomarsino 415 (GH)                       | Peru       | KP014267 | KP014988 | KP014444 | -        | KU670769 | -        | -        |
| <i>Centropogon dissectus</i> E. Wimm.                     | J. Luteyn 5678 (GB)                           | Ecuador    | KP014212 | KP014992 | KP014561 | KP014722 | EF141026 | DQ356215 | -        |
| <i>Centropogon dombeyanus</i> E. Wimm                     | L. Lagomarsino 332 (GH)                       | Peru       | -        | KP014986 | KP014488 | KP014663 | -        | -        | -        |
| <i>Centropogon eilersii</i> Lammers & M.O. Dillon         | L. Lagomarsino 411 (GH)                       | Peru       | KU670739 | KU670685 | KU670729 | KU670715 | -        | -        | -        |

|                                                                        |                                              |            |          |          |          |          |          |          |          |
|------------------------------------------------------------------------|----------------------------------------------|------------|----------|----------|----------|----------|----------|----------|----------|
| <i>Centropogon erythraeus</i> Drake                                    | L. Andersson 2529 (GB)                       | Ecuador    | KP014227 | KP014936 | KP014559 | KP014740 | -        | -        | -        |
| <i>Centropogon featherstonei</i> Gleason                               | L. Lagomarsino 318 (GH)                      | Peru       | KP014219 | KP014933 | KP014548 | KP014737 | KU670758 | -        | -        |
| <i>Centropogon ferrugineus</i> (L.f) Gleason                           | D. Santamaría S-902 (GB)                     | Costa Rica | KP014216 | KP014920 | KP014543 | KP014729 | -        | -        | -        |
| <i>Centropogon ferrugineus</i> (L.f) Gleason                           | L. Lagomarsino 22 (GH)                       | Costa Rica | KP014217 | KP014925 | KP014544 | KP014730 | KU670759 | -        | -        |
| <i>Centropogon ferrugineus</i> (L.f) Gleason                           | L. Lagomarsino 103 (GH)                      | Panama     | KP014203 | KP014919 | KP014538 | KP014696 | -        | -        | -        |
| <i>Centropogon foetidus</i> (Kunth) E. Wimm.                           | C. D. Bacon 288A (GB)                        | Colombia   | KP014200 | KP014971 | KP014563 | KP014774 | -        | -        | -        |
| <i>Centropogon gamosepalus</i> Zahlb.                                  | N. Muchhala 429; Harling and Andersson 24342 | Ecuador    | KP014130 | KP014823 | KP014404 | KP014627 | DQ356157 | DQ356225 | DQ356105 |
| <i>Centropogon glabrifilis</i> (E. Wimm.) Jeppsen                      | L. Andersson 2423 (GB)                       | Ecuador    | KP014222 | KP014916 | KP014542 | KP014728 | KU670760 | -        | -        |
| <i>Centropogon gloriosus</i> (Britton) Zahlb.                          | L. Lagomarsino 199 (GH)                      | Bolivia    | KP014294 | KP014979 | KP014451 | KP014670 | KU670761 | -        | -        |
| <i>Centropogon grandidentatus</i> (Schltdl.) Zahlbr.                   | UCBG 81.0952                                 | Cultivated | KU670747 | KU670688 | KU670721 | KU670702 | -        | -        | -        |
| <i>Centropogon granulosus</i> subsp. <i>granulosus</i> Stein (ined.) 1 | Andersson 2477                               | Ecuador    | KP014136 | KU670682 | KP014407 | KU670701 | DQ356152 | DQ356220 | DQ356101 |
| <i>Centropogon granulosus</i> subsp. <i>granulosus</i> Stein (ined.) 2 | L. Lagomarsino 330 (GH)                      | Peru       | KP014142 | KP014841 | KP014413 | KP014614 | -        | -        | -        |
| <i>Centropogon granulosus</i> subsp. <i>lugens</i> Stein (ined.)       | C. D. Bacon 303 (GB)                         | Colombia   | KP014123 | KP014840 | KP014416 | KP014618 | -        | -        | -        |
| <i>Centropogon granulosus</i> subsp. <i>nutans</i> Stein (ined.)       | D. Santamaría S-962 (GB)                     | Costa Rica | KP014145 | KP014830 | KP014394 | KP014623 | -        | -        | -        |
| <i>Centropogon granulosus</i> subsp. <i>tortilis</i> Stein (ined.)     | C. Persson 829 (GB)                          | Panama     | KP014126 | KP014821 | KP014411 | KP014605 | -        | -        | -        |
| <i>Centropogon granulosus</i> C. Presl. 1                              | C. D. Bacon 306 (GB)                         | Colombia   | KU670749 | -        | KU670725 | KU670703 | -        | -        | -        |
| <i>Centropogon granulosus</i> C. Presl. 2                              | L. Lagomarsino 56 (GH)                       | Costa Rica | KP014147 | KP014833 | KP014395 | KP014625 | -        | -        | -        |
| <i>Centropogon granulosus</i> C. Presl. 3                              | L. Lagomarsino 81 (GH)                       | Costa Rica | KP014144 | KP014829 | KP014393 | KP014622 | -        | -        | -        |

|                                                           |                         |            |          |          |          |          |          |          |          |
|-----------------------------------------------------------|-------------------------|------------|----------|----------|----------|----------|----------|----------|----------|
| <i>Centropogon granulosus</i> C. Presl. 4                 | L. Lagomarsino 301 (GH) | Panama     | KP014140 | -        | KP014396 | KP014616 | -        | -        | -        |
| <i>Centropogon gutierrezii</i> (Planch & Oerst.) E. Wimm. | L. Lagomarsino 19 (GH)  | Costa Rica | KP014301 | KP014950 | KP014466 | KP014745 | -        | -        | -        |
| <i>Centropogon hirtus</i> (Cav.) C. Presl.                | L. Lagomarsino 392      | Peru       | KU670743 | KU670680 | KU670727 | KU670708 | KU670762 | -        | -        |
| <i>Centropogon incanus</i> (Britton) Zahlb.               | S. Acha 207 (MO)        | Bolivia    | KP014279 | KP014998 | KP014480 | KP014659 | -        | -        | -        |
| <i>Centropogon incanus</i> (Britton) Zahlbr..             | L. Lagomarsino 223 (GH) | Bolivia    | KP014285 | KP014997 | KP014476 | KP014662 | -        | -        | -        |
| <i>Centropogon isabellinus</i> E. Wimm.                   | L. Lagomarsino 406 (GH) | Peru       | KP014280 | KP014983 | KP014445 | KP014679 | -        | -        | -        |
| <i>Centropogon leucocarpus</i> McVaugh                    | L. Lagomarsino 280 (GH) | Panama     | KP014162 | KP014951 | KP014462 | KP014743 | KU670763 | -        | -        |
| <i>Centropogon llanganatensis</i> Jeppsen                 | N. Muchhala 139         | Ecuador    | KP014226 | KP014926 | KP014556 | KP014727 | -        | -        | -        |
| <i>Centropogon luteus</i> E. Wimm.                        | L. Andersson 2411 (GB)  | Ecuador    | KP014214 | KP014922 | KP014555 | KP014731 | DQ356151 | DQ356219 | DQ356100 |
| <i>Centropogon luteynii</i> Wilbur                        | L. Lagomarsino 259 (GH) | Panama     | KP014161 | KP014911 | KP014432 | KP014747 | KU670764 | -        | -        |
| <i>Centropogon macbridei</i> Gleason                      | L. Lagomarsino 337 (GH) | Peru       | KP014208 | KP014917 | KP014540 | KP014732 | -        | -        | -        |
| <i>Centropogon macrocarpus</i> Zahlb.                     | L. Valenzuela 858 (OSH) | Peru       | KP014289 | -        | KP014460 | -        | -        | -        | -        |
| <i>Centropogon macrophyllus</i> (G. Don.) E. Wimm         | L. Lagomarsino 345 (GH) | Peru       | KP014120 | KP014824 | KP014405 | KP014629 | -        | -        | -        |
| <i>Centropogon magnificus</i> Zahlb.                      | A. Fuentes 10044 (LPB)  | Bolivia    | KP014288 | KP014995 | KP014475 | KP014658 | -        | -        | -        |
| <i>Centropogon mandonis</i> Zahlb.                        | A. Timmermann 1 (AAU)   | Bolivia    | KP014282 | KP014999 | KP014478 | KP014687 | -        | -        | -        |
| <i>Centropogon mandonis</i> Zahlb.                        | L. Lagomarsino 243 (GH) | Bolivia    | KP014295 | KP014977 | KP014452 | KP014666 | -        | -        | -        |
| <i>Centropogon medusa</i> E. Wimm.                        | N. Muchhala 174         | Ecuador    | KP014223 | KP014930 | KP014549 | KP014692 | KU670765 | -        | -        |
| <i>Centropogon minimus</i> McVaugh                        | C. D. Bacon 264B (GB)   | Colombia   | KP014254 | KP014947 | KP014458 | KP014698 | -        | -        | -        |
| <i>Centropogon nervosus</i> Wimm                          | L. Lagomarsino 407 (GH) | Peru       | KP014202 | KP014915 | KP014539 | KP014724 | -        | -        | -        |
| <i>Centropogon nigricans</i> Zahlb.                       | J. Ramos 7097 (OSH)     | Ecuador    | KP014209 | -        | KP014565 | -        | -        | -        | -        |

|                                                    |                          |            |          |          |          |          |          |   |   |
|----------------------------------------------------|--------------------------|------------|----------|----------|----------|----------|----------|---|---|
| <i>Centropogon nigricans</i> Zahlb.                | N. Muchhala 118          | Ecuador    | KP014210 | KP015007 | KP014566 | KP014723 | -        | - | - |
| <i>Centropogon palmanus</i> (J. D. Smith) E. Wimm. | L. Lagomarsino 193a (GH) | Costa Rica | KP014303 | KP014843 | KP014746 | KP014746 | -        | - | - |
| <i>Centropogon panamensis</i> Wilbur               | L. Lagomarsino 308 (GH)  | Panama     | KP014131 | KP014828 | KP014403 | KP014613 | -        | - | - |
| <i>Centropogon perlongus</i> Gleason               | L. Lagomarsino 409 (GH)  | Peru       | KP014265 | KP014989 | KP014447 | KP014681 | -        | - | - |
| <i>Centropogon peruvianus</i> (E. Wimm.) McVaugh   | L. Lagomarsino 386 (GH)  | Peru       | KU670744 | KU670683 | KU670723 | KU670695 | KU670766 | - | - |
| <i>Centropogon pichinchensis</i> Zahlb.            | J. Luteyn 14284 (OSH)    | Ecuador    | KP014220 | -        | KP014550 | -        | -        | - | - |
| <i>Centropogon preslii</i> E. Wimm.                | L. Andersson 2503 (GB)   | Ecuador    | KP014225 | KP014929 | KP014553 | KP014734 | -        | - | - |
| <i>Centropogon pulcher</i> Zahlb.                  | L. Lagomarsino 344 (GH)  | Peru       | KP014143 | KP014842 | KP014415 | KP014615 | KU670767 | - | - |
| <i>Centropogon reticulatus</i> Drake               | M. Merello 1099 (MO)     | Peru       | KP014185 | KP014921 | KP014557 | KP014718 | -        | - | - |
| <i>Centropogon rex</i> E. Wimm.                    | C. D. Bacon 288 (GB)     | Colombia   | KP014201 | KP014972 | KP014564 | KU670693 | KU670768 | - | - |
| <i>Centropogon roseus</i> Rusby                    | L. Lagomarsino 372 (GH)  | Peru       | KP014119 | KP014827 | KP014412 | KP014628 | KU670808 | - | - |
| <i>Centropogon salviaeformis</i> Zahlb.            | N. Muchhala 173          | Ecuador    | KP014230 | KP014932 | KP014554 | KP014726 | -        | - | - |
| <i>Centropogon simulans</i> Lammers                | L. Lagomarsino 402 (GH)  | Peru       | KP014281 | KP014974 | KP014461 | KP014646 | KU670770 | - | - |
| <i>Centropogon smithii</i> E. Wimm.                | L. Lagomarsino 68 (GH)   | Costa Rica | KP014211 | KP015008 | KP014562 | KP014772 | -        | - | - |
| <i>Centropogon sodiroanus</i> Zahlb.               | N. Muchhala 106          | Ecuador    | KP014204 | KP015011 | KP014568 | KU670706 | -        | - | - |
| <i>Centropogon solanifolius</i> Benth. 1           | C. D. Bacon 261 (GB)     | Colombia   | KP014134 | KP014839 | KP014402 | KU670696 | -        | - | - |
| <i>Centropogon solanifolius</i> Benth. 2           | L. Lagomarsino 25 (GH)   | Costa Rica | KP014132 | KP014832 | KP014398 | KP014626 | -        | - | - |
| <i>Centropogon solanifolius</i> Benth. 3           | D. Santamaría S-904 (GB) | Costa Rica | KP014133 | KP014834 | KP014397 | KP014621 | -        | - | - |
| <i>Centropogon subandinus</i> Zahlb.               | N. Muchhala 475          | Ecuador    | KP014207 | KP014913 | KP014569 | KP014756 | -        | - | - |



|                                                      |                                                 |            |          |          |          |          |          |          |          |
|------------------------------------------------------|-------------------------------------------------|------------|----------|----------|----------|----------|----------|----------|----------|
| <i>Centropogon talamancensis</i> Wilbur              | L. Lagomarsino 140 (GH)                         | Costa Rica | KP014302 | KP014953 | KP014467 | KP014748 | -        | -        | -        |
| <i>Centropogon tessmannii</i> E. Wimm.               | N. Muchhala 168                                 | Ecuador    | KP014150 | KP014882 | KP014344 | KP014700 | KU670773 | -        | -        |
| <i>Centropogon trachyanthus</i> E. Wimm.             | N. Muchhala 138                                 | Ecuador    | KP014137 | KP014838 | KP014401 | KP014606 | -        | -        | -        |
| <i>Centropogon trichodes</i> E. Wimm.                | L. Andersson 2546 (GB)                          | Ecuador    | KP014213 | KP014970 | KP014535 | KP014766 | KU670780 | DQ356217 | DQ356098 |
| <i>Centropogon umbrosus</i> E. Wimm                  | L. Lagomarsino 349 (GH)                         | Peru       | KP014125 | KP014825 | -        | KP014631 | -        | -        | -        |
| <i>Centropogon unduavensis</i> (Britton) Zahlb.      | J. Solomon 15418 (LPB)                          | Bolivia    | KP014290 | KP014978 | KP014453 | -        | -        | -        | -        |
| <i>Centropogon urubambae</i> E. Wimm                 | L. Lagomarsino 347 (GH)                         | Peru       | KP014148 | KP014831 | KP014414 | KP014617 | -        | -        | -        |
| <i>Centropogon valerioi</i> Standley                 | D. Santamaría S-977 (GB)                        | Costa Rica | KP014215 | KP014924 | KP014545 | KP014733 | -        | -        | -        |
| <i>Centropogon vargasii</i> B. A. Stein (ined.)      | L. Lagomarsino 356 (GH)                         | Peru       | KU670745 | KU670681 | KU670732 |          | KU670772 | -        | -        |
| <i>Centropogon viriduliflorus</i> Wimm               | L. Lagomarsino 370 (GH)                         | Peru       | KP014268 | KP015006 | KP014487 | KP014665 | -        | -        | -        |
| <i>Centropogon viriduliflorus</i> Wimm               | L. Valenzuela 712 (OSH)                         | Peru       | KP014266 | -        | KP014448 | -        | -        | -        | -        |
| <i>Centropogon weberbaueri</i> Zahlb.                | L. Lagomarsino 317(GH)                          | Peru       | KP014218 | KP014934 | KP014547 | KP014736 | -        | -        | -        |
| <i>Centropogon cf. weberbaueri</i> Zahlb.            | L. Lagomarsino 351 (GH)                         | Peru       | KP014232 | KP014935 | KP014552 | KP014735 | -        | -        | -        |
| <i>Centropogon yarumalensis</i> E. Wimm.             | C. D. Bacon 263 (GB)                            | Colombia   | KP014221 | KP014918 | KP014541 | KP014725 | KU670775 | -        | -        |
| <i>Centropogon yungasensis</i> Britton               | L. Lagomarsino 392 (GH)                         | Peru       | KP014149 | KP014818 | KP014391 | KP014619 | KU670776 | -        | -        |
| <i>Centropogon</i> sp. nov. (Lagom. & Santam. ined.) | L. Lagomarsino 354 (GH)                         | Peru       | KP014269 | KP014987 | KP014489 | KP014664 | -        | -        | -        |
| <i>Centropogon</i> sp.                               | A. Antonelli 611                                | Ecuador    | KU670748 | KU670687 | KU670722 | KU670705 | -        | -        | -        |
| <b>Lobelia</b>                                       |                                                 |            |          |          |          |          |          |          |          |
| <i>Lobelia bridgesii</i> Hook & Arn.                 | M. Gustafsson 1019 (AAU)                        | Cultivated | KP014077 | KP014800 | KP014338 | KP014584 | -        | -        | -        |
| <i>Lobelia excelsa</i> Bonpland                      | L. Lagomarsino 426 (GH);<br>Lammers et al. 6357 | Cultivated | KP014078 | KP014801 | KP014341 | KP014586 | DQ356146 | DQ356212 | -        |

|                                        |                                                                   |            |          |          |          |          |          |          |   |
|----------------------------------------|-------------------------------------------------------------------|------------|----------|----------|----------|----------|----------|----------|---|
| <i>Lobelia polyphylla</i> Hook. & Arn. | Lammers et al. 6331 (GB)                                          | Cultivated | -        | -        | -        | -        | DQ356123 | DQ356177 | - |
| <i>Lobelia tupa</i> L.                 | Cultivated, University of Aarhus; Lammers and Rodriguez 6329 (GB) | Cultivated | KP014076 | KP014802 | KP014339 | KP014585 | KU670784 | DQ356211 | - |

***Lysipomia***

|                                                |                         |         |          |          |          |          |          |          |   |
|------------------------------------------------|-------------------------|---------|----------|----------|----------|----------|----------|----------|---|
| <i>Lysipomia cuspidata</i> McVaugh             | L. Andersson 2559 (GB)  | Ecuador | KP014057 | -        | KP014318 | KP014579 | DQ356133 | DQ356198 | - |
| <i>Lysipomia muscoides</i> Hook f.             | L. Lagomarsino 325 (GH) | Peru    | KP014051 | -        | KP014312 | KP014575 | -        | -        | - |
| <i>Lysipomia pumila</i> (Wedd.) E. Wimm.       | L. Lagomarsino 238 (GH) | Bolivia | KP014056 | KP014791 | KP014317 | KP014580 | KU670783 | -        | - |
| <i>Lysipomia sphagnophila</i> Griseb. Ex Wedd. | L. Andersson 2444 (GB)  | Ecuador | KP014052 | -        | KP014313 | KP014576 | DQ356132 | DQ356197 | - |
| <i>Lysipomia vitreola</i> McVaugh              | A. Antonelli 581 (GB)   | Ecuador | KP014058 | KP014792 | KP014319 | KU670704 | -        | -        | - |

***Siphocampylus* (excluding section *Hemisiphocampylus*)**

|                                                       |                         |          |          |          |          |          |          |          |          |
|-------------------------------------------------------|-------------------------|----------|----------|----------|----------|----------|----------|----------|----------|
| <i>Siphocampylus actinothrix</i> E. Wimm.             | L. Lagomarsino 403 (GH) | Peru     | KP014086 | KP014812 | KP014367 | KP014643 | -        | -        | -        |
| <i>Siphocampylus</i> aff. <i>actinothrix</i> E. Wimm. | L. Lagomarsino 361 (GH) | Peru     | KP014086 | KP014812 | KP014367 | KP014643 | -        | -        | -        |
| <i>Siphocampylus affinis</i> (Mirb.) McVaugh          | B. Lojtnant 11426 (GB)  | Ecuador  | KP014270 | -        | KP014456 | KP014661 | DQ356155 | DQ356223 | DQ356104 |
| <i>Siphocampylus ambivalens</i> Lammers               | J. Wood 9986            | Bolivia  | KP014151 | KP014806 | KP014421 | KP014650 | -        | -        | -        |
| <i>Siphocampylus andinus</i> Britton                  | L. Lagomarsino 226 (GH) | Bolivia  | KP014260 | KP014984 | KP014500 | KP014654 | KU670782 | -        | -        |
| <i>Siphocampylus angustiflorus</i> Schlechtend.       | L. Lagomarsino 417 (GH) | Peru     | KP014097 | KP014887 | KP014379 | KP014633 | KU670785 | -        | -        |
| <i>Siphocampylus antioquianus</i> E. Wimm.            | C. D. Bacon 242 (GB)    | Colombia | KP014090 | KP014943 | KP014364 | KU670710 | -        | -        | -        |
| <i>Siphocampylus aureus</i> Rusby                     | J. Wood 14956           | Bolivia  | KP014105 | KP014898 | KP014383 | KU670718 | KU670786 | -        | -        |
| <i>Siphocampylus ayersiae</i> Lammers                 | L. Lagomarsino 212 (GH) | Bolivia  | KP014297 | KP014965 | KP014437 | KP014648 | -        | -        | -        |
| <i>Siphocampylus betulaeifolius</i> (Cham.) G. Don.   | S. Godoy 3000 (UEC)     | Brazil   | KP014153 | KP014904 | KP014420 | KP014694 | KU670788 | -        | -        |

|                                                      |                                       |         |          |          |          |          |          |          |          |
|------------------------------------------------------|---------------------------------------|---------|----------|----------|----------|----------|----------|----------|----------|
| <i>Siphocampylus bilabiatus</i> Zahlb.               | A. Araujo-Murakami 4230 (MO)          | Bolivia | KP014256 | KP015016 | KP014423 | KP014677 | KU670789 | -        | -        |
| <i>Siphocampylus boliviensis</i> Zahlb.              | L. Lagomarsino 239 (GH)               | Bolivia | KP014252 | KP014960 | KP014483 | KP014673 | -        | -        | -        |
| <i>Siphocampylus brevicalyx</i> E. Wimm.             | N. Muchhala 480; Lojtnant et al 11826 | Ecuador | KP014245 | KP014901 | KP014433 | KP014715 | KU670790 | DQ356224 | -        |
| <i>Siphocampylus chloroleucus</i> E. Wimm            | Asplund 13060 (S)                     | Ecuador | KP014098 | KP014903 | KP014377 | KP014611 | -        | -        | -        |
| <i>Siphocampylus citrinus</i> E. Wimm                | L. Lagomarsino 368 (GH)               | Peru    | KP014115 | KP014896 | KP014374 | KP014604 | KU670792 | -        | -        |
| <i>Siphocampylus clotho</i> E. Wimm.                 | L. Lagomarsino 367 (GH)               | Peru    | KU670742 | KU670686 | KU670728 | KU670714 | KU670791 | -        | -        |
| <i>Siphocampylus convolvulaceus</i> (Cham.) G. Don.  | F. M. Souza 104 (UEC)                 | Brazil  | KP014159 | KP014907 | KP014481 | KP014645 | -        | -        | -        |
| <i>Siphocampylus correoides</i> Zahlb.               | A. Timmermann 3 (AAU)                 | Bolivia | KP014298 | KP014967 | KP014436 | KP014657 | -        | -        | -        |
| <i>Siphocampylus corymbifer</i> Pohl                 | A. Timmermann 9 (AAU)                 | Bolivia | KP014155 | KP014941 | KP014347 | -        | -        | -        | -        |
| <i>Siphocampylus corymbifer</i> Pohl                 | A. Glaziou s.n.                       | Bolivia | KP014156 | KP014940 | KP014348 | -        | -        | -        | -        |
| <i>Siphocampylus corymbifer</i> Pohl                 | L. Lagomarsino 216 (GH)               | Bolivia | KP014157 | KP014942 | KP014346 | KP014693 | KU670796 | -        | -        |
| <i>Siphocampylus corynoides</i> E. Wimm              | L. Lagomarsino 353 (GH)               | Peru    | KP014117 | KP014910 | KP014361 | KP014610 | -        | -        | -        |
| <i>Siphocampylus dependens</i> (Ruiz & Pavon) G. Don | L. Lagomarsino 316 (GH)               | Peru    | KP014261 | KP015000 | KP014485 | KP014690 | -        | -        | -        |
| <i>Siphocampylus elfriedii</i> E. Wimm               | L. Lagomarsino 387 (GH)               | Peru    | KP014084 | KP014813 | KP014371 | KP014641 | KU670793 | -        | -        |
| <i>Siphocampylus fiebrigii</i> E. Wimm               | S. Beck 31446 (LPB)                   | Bolivia | KP014100 | KP014900 | KP014382 | KP014599 | -        | -        | -        |
| <i>Siphocampylus flagelliformis</i> Zahlb.           | E. Garcia 2006 (GB)                   | Bolivia | KP014096 | KP014883 | KP014378 | KP014612 | -        | -        | -        |
| <i>Siphocampylus flagelliformis</i> Zahlb.           | L. Lagomarsino 220 (GH)               | Bolivia | KP014099 | KP014888 | KP014380 | KP014632 | KU670794 | -        | -        |
| <i>Siphocampylus fulgens</i> Hort.                   | Hatschbacch 44995 (GB)                | Ecuador | KP014081 | KP015014 | KP014434 | KP014719 | EF141032 | DQ356216 | -        |
| <i>Siphocampylus giganteus</i> (Cav.) G. Don.        | L. Andersson 2432 (GB)                | Ecuador | -        | KP015002 | KP014533 | KP014761 | DQ356154 | DQ356222 | DQ356103 |

|                                                             |                         |            |          |          |          |          |          |          |          |
|-------------------------------------------------------------|-------------------------|------------|----------|----------|----------|----------|----------|----------|----------|
| <i>Siphocampylus giganteus</i> (Cav.) G. Don.               | N. Muchhala 101         | Ecuador    | KP014205 | KP015001 | KP014534 | KU670699 | EF174621 | -        | -        |
| <i>Siphocampylus imbricatus</i> (Cham.) G. Don.             | P. Nuñez 8182 (AAU)     | Brazil     | -        | KU670679 | KP014329 | KU670698 | -        | -        | -        |
| <i>Siphocampylus jelskii</i> Zahlb.                         | L. Lagomarsino 321 (GH) | Peru       | KP014199 | KP014956 | KP014567 | KP014764 | KU670795 | -        | -        |
| <i>Siphocampylus krauseanus</i> E. Wimm.                    | L. Lagomarsino 418      | Peru       | -        | KU670678 | KU670736 | KU670713 | KU670797 | -        | -        |
| <i>Siphocampylus longipedunculatus</i> Pohl                 | A. Antonelli 299 (GB)   | Brazil     | KP014238 | KP014905 | KP014471 | KP014697 | -        | -        | -        |
| <i>Siphocampylus lycioides</i> (Cham.) G. Don.              | R. Romero 3805 (UEC)    | Brazil     | KP014247 | KP014808 | KP014352 | KP014710 | KU670798 | -        | -        |
| <i>Siphocampylus macropodus</i> (Billb.) G. Don.            | A. Antonelli 298 (GB)   | Brazil     | KP014107 | KP014890 | KP014365 | KP014639 | DQ356153 | DQ356221 | DQ356102 |
| <i>Siphocampylus matthiae</i> A. DC.                        | L. Lagomarsino 313 (GH) | Peru       | KP014190 | KP014968 | KP014536 | KP014765 | KU670807 | -        | -        |
| <i>Siphocampylus membraceus</i> Britton                     | A. Gentry 44,526 (MO)   | Bolivia    | KP014094 | KP014885 | KP014388 | -        | -        | -        | -        |
| <i>Siphocampylus nematosepalus</i> (Donn. Smith)<br>E. Wimm | L. Lagomarsino 164 (GH) | Costa Rica | KP014300 | KP014952 | KP014463 | KP014741 | KU670800 | -        | -        |
| <i>Siphocampylus nemoralis</i> Griseb.                      | D. Spooner 6605         | Bolivia    | KP014112 | KP014944 | KP014426 | -        | -        | -        | -        |
| <i>Siphocampylus neurotrichus</i> E. Wimm                   | M. Nee 42251 (NY)       | Bolivia    | KP014108 | KP014889 | KP014381 | KP014603 | -        | -        | -        |
| <i>Siphocampylus nitidus</i> Pohl                           | J. Pirani 689 (UEC)     | Brazil     | -        | -        | KP014349 | -        | -        | -        | -        |
| <i>Siphocampylus oblongifolius</i> Rusby                    | J. L. Clark 6687 (OSH)  | Bolivia    | KP014093 | KP014884 | KP014358 | KP014636 | -        | -        | -        |
| <i>Siphocampylus oblongifolius</i> Rusby                    | S. Beck 30201 (LPB)     | Bolivia    | KP014095 | KP014886 | KP014389 | -        | -        | -        | -        |
| <i>Siphocampylus obovatus</i> (G. Don) E. Wimm              | L. Lagomarsino 350 (GH) | Peru       | KP014116 | -        | KP014360 | KP014609 | -        | -        | -        |
| <i>Siphocampylus orbignianus</i> A. DC.                     | L. Lagomarsino 217 (GH) | Bolivia    | KP014152 | KP014807 | KP014422 | KP014655 | -        | -        | -        |
| <i>Siphocampylus puberulus</i> E. Wimm                      | Vargas 226 (LPB)        | Bolivia    | KP014109 | KP014964 | KP014427 | -        | -        | -        | -        |
| <i>Siphocampylus pubescens</i> Benth.                       | B. Ollgaard 74216 (GH)  | Ecuador    | KP014080 | -        | KP014419 | -        | -        | -        | -        |
| <i>Siphocampylus</i> aff. <i>rictus</i> Lammers             | L. Lagomarsino 341 (GH) | Peru       | KP014082 | KP014811 | KP014363 | KP014640 | -        | -        | -        |

|                                                          |                         |           |          |          |          |          |          |          |          |
|----------------------------------------------------------|-------------------------|-----------|----------|----------|----------|----------|----------|----------|----------|
| <i>Siphocampylus rosmarinifolius</i> G. Don.             | L. Lagomarsino 331 (GH) | Peru      | KP014113 | KP014909 | KP014362 | KP014634 | KU670801 | -        | -        |
| <i>Siphocampylus rusbyanus</i> Britton                   | A. Fuentes 4760 (MO)    | Bolivia   | KP014264 | KP015012 | KP014431 | KP014689 | KU670802 | -        | -        |
| <i>Siphocampylus scandens</i> (HBK) G. Don.              | L. Andersson 2515 (GB)  | Ecuador   | KP014248 | KP014973 | KP014356 | KP014592 | DQ356150 | DQ356218 | DQ356099 |
| <i>Siphocampylus sceptrum</i> Decaisne apud Linden       | L. Dorr 20513           | Venezuela | KP014242 | KP015009 | KP014392 | KP014597 | -        | -        | -        |
| <i>Siphocampylus smilax</i> Lammers                      | L. Lagomarsino 250 (GH) | Bolivia   | KP014079 | KP014908 | KP014342 | KP014649 | KU670803 | -        | -        |
| <i>Siphocampylus sparsipilus</i> E. Wimm                 | L. Lagomarsino 197 (GH) | Bolivia   | KP014278 | KP014939 | KP014492 | KP014652 | KU670804 | -        | -        |
| <i>Siphocampylus tunarensis</i> Zahlb.                   | L. Lagomarsino 232 (GH) | Bolivia   | KP014271 | KP014975 | KP014435 | KP014674 | KU670752 | -        | -        |
| <i>Siphocampylus tunicatus</i> Zahlb.                    | L. Lagomarsino 235 (GH) | Bolivia   | KP014272 | KP014991 | KP014443 | KP014676 | KU670754 | -        | -        |
| <i>Siphocampylus tupaiformis</i> Zahlb.                  | A. Timmermann 7 (LPB)   | Bolivia   | KP014111 | KP014962 | KP014429 | KP014708 | -        | -        | -        |
| <i>Siphocampylus umbellatus</i> (HBK) G. Don.            | L. Lagomarsino 193 (GH) | Bolivia   | KP014275 | KP014994 | KP014442 | KP014672 | -        | -        | -        |
| <i>Siphocampylus vatkeanus</i> Zahlb.                    | N. Paniagua 5774 (MO)   | Bolivia   | KP014088 | KP014816 | KP014369 | KP014608 | KU670753 | -        | -        |
| <i>Siphocampylus veteranus</i> Wimm                      | L. Lagomarsino 388 (GH) | Peru      | KP014087 | KP014815 | KP014373 | KP014644 | KU670781 | -        | -        |
| <i>Siphocampylus virgatus</i> A. DC.                     | L. Lagomarsino 343 (GH) | Peru      | KP014091 | KP014958 | KP014357 | KP014607 | KU670755 | -        | -        |
| <i>Siphocampylus werdermannii</i> E. Wimm                | L. Lagomarsino 245 (GH) | Bolivia   | KP014106 | KP014893 | KP014376 | KP014602 | -        | -        | -        |
| <i>Siphocampylus westinianus</i> (Billb.) Pohl           | A. Antonelli 308 (GB)   | Brazil    | KP014154 | KP014906 | KP014472 | KP014587 | -        | -        | -        |
| <i>Siphocampylus</i> sp.                                 | L. Lagomarsino 333 (GH) | Peru      | KP014262 | KP015010 | KP014486 | KP014691 | -        | -        | -        |
| <i>Siphocampylus</i> sp. nov. 1 (Lagom. & Santam. ined.) | L. Lagomarsino 241 (GH) | Bolivia   | KP014274 | KP014990 | KP014440 | KP014675 | -        | -        | -        |
| <i>Siphocampylus</i> sp. nov. 2 (Lagom. & Santam. ined.) | L. Lagomarsino 400 (GH) | Peru      | KP014085 | KP014814 | KP014372 | KP014642 | -        | -        | -        |

## OUTGROUP

***Apetahia***

|                                              |     |                     |   |   |   |   |          |          |   |
|----------------------------------------------|-----|---------------------|---|---|---|---|----------|----------|---|
| <i>Apetahia margaretae</i> (F. Br.) E. Wimm. | N/A | French<br>Polynesia | - | - | - | - | DQ285286 | DQ285169 | - |
|----------------------------------------------|-----|---------------------|---|---|---|---|----------|----------|---|

***Brighamia***

|                                   |                    |        |   |   |   |   |          |          |   |
|-----------------------------------|--------------------|--------|---|---|---|---|----------|----------|---|
| <i>Brighamia insignis</i> A. Gray | Antonelli 251 (GB) | Hawaii | - | - | - | - | AF042664 | DQ356189 | - |
|-----------------------------------|--------------------|--------|---|---|---|---|----------|----------|---|

***Campanula***

|                                     |                         |         |          |   |          |          |          |          |          |
|-------------------------------------|-------------------------|---------|----------|---|----------|----------|----------|----------|----------|
| <i>Campanula asperuloides</i> Harms | Antonelli 283 (GB)      | Greece  | -        | - | -        | -        | DQ356117 | DQ356170 | DQ356090 |
| <i>Campanula carpatica</i> Jacq.    | Gaskin 121 (MO)         | unknown | -        | - | -        | -        | EU713410 | -        | -        |
| <i>Campanula latifolia</i> L.       | Antonelli 252(GB)       | Sweden  | -        | - | -        | -        | EF141027 | DQ356169 | DQ356089 |
| <i>Campanula medium</i> L.          | L. Lagomarsino 422 (GH) | USA     | KP014048 | - | KP014307 | KP014571 | -        | -        | -        |
| <i>Campanula pyramidalis</i> Gilib. | Eddie 96089 (EGHB)      | unknown | -        | - | -        | -        | EU713429 | GQ254919 | -        |
| <i>Campanula trachelium</i> Brot.   | Antonelli 281 (GB)      | Sweden  | -        | - | -        | -        | DQ356118 | DQ356171 | DQ356091 |

***Canarina***

|                                        |                                            |       |   |   |   |   |          |          |          |
|----------------------------------------|--------------------------------------------|-------|---|---|---|---|----------|----------|----------|
| <i>Canarina canariensis</i> (L.) Vatke | Eddie 96048 (EGHB);<br>Andersson 2394 (GB) | Spain | - | - | - | - | EU713353 | DQ356167 | DQ356087 |
|----------------------------------------|--------------------------------------------|-------|---|---|---|---|----------|----------|----------|

***Clermontia***

|                                                  |                                         |        |   |   |          |          |          |          |          |
|--------------------------------------------------|-----------------------------------------|--------|---|---|----------|----------|----------|----------|----------|
| <i>Clermontia arborescens</i> (H. Mann) Hillebr. | I. Carter 1                             | Hawaii | - | - | KU670724 | KU670694 | KU670779 | DQ285141 | -        |
| <i>Clermontia fauriei</i> H. Lév.                | Johansen 1                              | Hawaii | - | - | -        | -        | JX500350 | DQ285142 | -        |
| <i>Clermontia kakeana</i> Meyen.                 | Johansen 5; Takeuchi Koolau<br>56a (GB) | Hawaii | - | - | -        | -        | JX500348 | DQ285143 | DQ356092 |

***Cyanea***

|                                               |                           |        |   |   |   |   |          |          |   |
|-----------------------------------------------|---------------------------|--------|---|---|---|---|----------|----------|---|
| <i>Cyanea angustifolia</i> Hillebr.           | Takeuchi et al. 1802 (GB) | Hawaii | - | - | - | - | DQ356119 | DQ356173 | - |
| <i>Cyanea asplenifolia</i> (H. Mann) Hillebr. | N/A                       | Hawaii | - | - | - | - | JX500351 | -        | - |
| <i>Cyanea koolauensis</i> Lammers, Givnish &  | Takeuchi & Pyle 2284 (GB) | Hawaii | - | - | - | - | DQ356128 | DQ356193 | - |

## Systema

***Delissea***

|                                   |                     |        |   |   |   |   |   |          |   |
|-----------------------------------|---------------------|--------|---|---|---|---|---|----------|---|
| <i>Delissea undulata</i> Gaudich. | Skottsberg 691 (GB) | Hawaii | - | - | - | - | - | DQ356188 | - |
|-----------------------------------|---------------------|--------|---|---|---|---|---|----------|---|

***Diastatea***

|                                                         |                                                      |              |          |          |          |          |          |                                    |          |
|---------------------------------------------------------|------------------------------------------------------|--------------|----------|----------|----------|----------|----------|------------------------------------|----------|
| <i>Diastatea micrantha</i> (Kunth) McVaugh              | L. Lagomarsino 44; Lojtnant and Molau 15184          | Costa Rica   | KP014066 | KP014803 | KP014327 | KP014581 | DQ356138 | DQ356203                           | DQ356095 |
| <b>Downingia</b>                                        |                                                      |              |          |          |          |          |          |                                    |          |
| <i>Downingia bacigalupii</i> Weiler                     | Mason 14384(S)                                       | California   | -        | -        | -        | -        | EF141031 | DQ356183                           | -        |
| <i>Downingia insignis</i> Greene                        | Tiehm 12143 (S)                                      | California   | -        | -        | -        | -        | EF141030 | DQ356185                           | -        |
| <b>Grammatotheca</b>                                    |                                                      |              |          |          |          |          |          |                                    |          |
| <i>Grammatotheca bergiana</i> (Cham.) C. Presl          | Bean & Viviers 2628 (GB)                             | South Africa | -        | -        | -        | -        | DQ356116 | DQ356168                           | DQ356088 |
| <b>Hippobroma</b>                                       |                                                      |              |          |          |          |          |          |                                    |          |
| <i>Hippobroma longiflora</i> (L.) G. Don                | L. Lagomarsino 346; Andersson and Nilsson 2492 (GB)  | Peru         | KP014072 | -        | KP014337 | KP014782 | KU670778 | DQ356206                           | DQ356096 |
| <b>Isotoma</b>                                          |                                                      |              |          |          |          |          |          |                                    |          |
| <i>Isotoma fluviatilis</i> F. Muell. Ex Bentham         | Cultivated, University of Aarhus, no voucher         | Clutivated   | KP014054 | KP014790 | KP014321 | KP014783 | DQ356161 | DQ356230                           | DQ356108 |
| <b>Jasione</b>                                          |                                                      |              |          |          |          |          |          |                                    |          |
| <i>Jasione montana</i> L.                               | F.I.Sales & C.Hedge 9898 (EGHB); Andersson 2562 (GB) | unknown      | -        | -        | -        | -        | EU713354 | DQ356174                           | -        |
| <b>Legousia</b>                                         |                                                      |              |          |          |          |          |          |                                    |          |
| <i>Legousia hybrid</i> Delarb.                          | Corneliuson s.n.; (GB 152920)                        | Sweden       | -        | -        | -        | -        | DQ356163 | DQ356234                           | DQ356111 |
| <b>Lobelia</b>                                          |                                                      |              |          |          |          |          |          |                                    |          |
| <i>Lobelia aguana</i> E. Wimm.                          | Koch 82120 (NY)                                      | Mexico       | -        | -        | -        | -        | DQ356122 | DQ356176                           | -        |
| <i>Lobelia alsinoides</i> Lam.                          | Larsen 34131 (AAU)                                   | Thailand     | KP014050 | KP014785 | KP014309 | KP014572 | -        | -                                  | -        |
| <i>Lobelia anceps</i> L.                                | Skottsberg 4536 (GB)                                 | Chile        | -        | -        | -        | -        | DQ356124 | DQ356184                           | -        |
| <i>Lobelia aquatica</i> Cham.                           | Jacobs et al. 4080(GB)                               | Guyana       | -        | -        | -        | -        | EF141029 | DQ356182                           | -        |
| <i>Lobelia assurgens</i> var. <i>portoricensis</i> Urb. | Trejo 28 (GH)                                        | Puerto Rico  | -        | -        | KU670730 | -        | -        | -                                  | -        |
| <i>Lobelia cardinalis</i> L.                            | L. Lagomarsino 423 (GH); T. Lammers 8710 (F)         | USA          | KP014060 | KP014794 | KP014314 | KU670717 | AY655144 | DQ356231<br>(Vincent<br>4377 (GB)) | AF130187 |

|                                                                    |                                                     |                 |          |          |          |          |                                |          |          |
|--------------------------------------------------------------------|-----------------------------------------------------|-----------------|----------|----------|----------|----------|--------------------------------|----------|----------|
| <i>Lobelia cardinalis</i> subsp. <i>graminea</i> (Lam.)<br>McVaugh | R. Kriebel 5570 (NY)                                | Guatemala       | KP014061 | KP014795 | KP014315 | -        | -                              | -        | -        |
| <i>Lobelia chinensis</i> Hance                                     | G.Kokubugata11397;<br>Hashimoto 409 (GB)            | Japan           | -        | -        | -        | -        | AB645974                       | DQ356228 | -        |
| <i>Lobelia cliffortiana</i> L.                                     | R. A. Howard 15704 (NY)                             | Puerto Rico     | -        | KU670691 | KU670733 | -        | -                              | -        | -        |
| <i>Lobelia cordifolia</i> Hook. & Arn.                             | Mexia 8780 (S)                                      | Mexico          | -        | -        | -        | -        | -                              | DQ356204 | -        |
| <i>Lobelia coronopifolia</i> L.                                    | Dahlstrand 1084(GB)                                 | South<br>Africa | -        | -        | -        | -        | EF141025                       | DQ356181 | -        |
| <i>Lobelia digitalifolia</i> (Griseb.) Urb.                        | R. A. Howard 19407 (NY)                             | Guadeloupe      | -        | -        | KP014324 | -        | -                              | -        | -        |
| <i>Lobelia dortmanna</i> L.                                        | Andersson 2561 (GB)                                 | Sweden          | -        | -        | -        | -        | DQ356162                       | DQ356232 | DQ356109 |
| <i>Lobelia erinus</i> L.                                           | Andersson 2570 (GB)                                 | Cultivated      | -        | -        | -        | -        | HM850129                       | DQ356233 | DQ356110 |
| <i>Lobelia exaltata</i> Pohl                                       | Antonelli 335 (GB)                                  | Brazil          | -        | -        | -        | -        | DQ356135                       | DQ356200 | DQ356093 |
| <i>Lobelia fistulosa</i> Raf.                                      | Antonelli & Andersson 279<br>(GB)                   | Brazil          | -        | -        | -        | -        | DQ356136                       | DQ356201 | DQ356094 |
| <i>Lobelia gibberoa</i> Hemsl.                                     | Jaasund s.n.; (GB 1.1.67)                           | Kenya           | -        | -        | -        | -        | DQ356127                       | DQ356192 | -        |
| <i>Lobelia graniticola</i> E. Wimm.                                | Thulin & Mhoro 3210 (C)                             | Tanzania        | -        | -        | -        | -        | DQ356129                       | DQ356194 | -        |
| <i>Lobelia gregoriana</i> Baker f.                                 | Hedberg 1608 (S)                                    | Kenya           | -        | -        | -        | -        | DQ356187                       | DQ356187 | -        |
| <i>Lobelia hederacea</i> Cham.                                     | A. Schinini 12141 (AAU)                             | Argentina       | KP014053 | KP014797 | KP014323 | KP014578 | -                              | -        | -        |
| <i>Lobelia hypoleuca</i> Hillebr.                                  | Selling & Skottsberg 3194<br>(GB)                   | Hawaii          | -        | -        | -        | -        | DQ356126                       | DQ356191 | -        |
| <i>Lobelia inflata</i> L.                                          | H. Schmidt 1531 (MO)                                | USA             | KP014062 | -        | KP014320 | -        | -                              | -        | -        |
| <i>Lobelia irasuenis</i> Planh. & Oerst.                           | L. Lagomarsino 5 (GH);<br>Burger & Burger 8151 (GB) | Costa Rica      | -        | KU670690 | KU670720 | -        | KU670750                       | DQ356175 | -        |
| <i>Lobelia kalmii</i> L.                                           | L. Lagomarsino 424 (GH); D.<br>Boufford 7292        | USA             | KP014059 | KP014793 | KP014316 | KP014577 | DQ356166<br>(Boufford<br>7292) | EF126736 | DQ356114 |
| <i>Lobelia kraussii</i> Graham                                     | Hill 25677(NY)                                      | Dominica        | -        | -        | -        | -        | EF141024                       | DQ356179 | -        |



|                                                  |                                                |              |          |          |          |          |          |          |          |  |
|--------------------------------------------------|------------------------------------------------|--------------|----------|----------|----------|----------|----------|----------|----------|--|
| <i>Lobelia laxiflora</i> Kunth.                  | L. Lagomarsino 289 (GH); D. Santamaria S-985   | Panama       | KP014065 | KP014799 | KP014326 | KP014777 | DQ356143 | DQ356209 | -        |  |
| <i>Lobelia leschenaultiana</i> Skottsbo.         | Skottsberg s.n.; (GB 11.XII.1926)              | Sri Lanka    | -        | -        | -        | -        | DQ356131 | DQ356196 | -        |  |
| <i>Lobelia martagon</i> Hitchc.                  | W. Judd 5375 (NY)                              | Jamaica      | KP014073 | -        | KP014335 | -        | KU670806 | DQ356205 | -        |  |
| <i>Lobelia nana</i> Kunth.                       | L. Lagomarsino 228 (GH)                        | Bolivia      | KP014063 | KP014796 | KP014328 | KP014775 | -        | -        | -        |  |
| <i>Lobelia oligophylla</i> (Wedd.) Lammers       | C. M. Taylor 11210 (NY); (Harling et al. 6807) | Argentina    | KP014055 | -        | KP014322 | KP014784 | KU670787 | DQ356227 | -        |  |
| <i>Lobelia persicifolia</i> Cav.                 | Whitefand 3782 (GH)                            | Guadeloupe   | -        | -        | KU670731 | -        | -        | -        | -        |  |
| <i>Lobelia physaloides</i> A. Cunn.              | Cameron s.n. (AAU)                             | New Zealand  | -        | -        | KP014311 | KP014574 | -        | -        | -        |  |
| <i>Lobelia portoricensis</i> (Vatke) Urb.        | Boom 10069 (NY)                                | Puerto Rico  | -        | -        | -        | -        | DQ356142 | DQ356208 | -        |  |
| <i>Lobelia roughii</i> Hook f.                   | Skottsberg s.n. (GB)                           | New Zealand  | -        | -        | -        | -        | DQ356165 | EF126737 | DQ356113 |  |
| <i>Lobelia sonderiana</i> (Kuntze) Lammers       | Volk 1095 (S)                                  | Namibia      | -        | -        | -        | -        | DQ356130 | DQ356195 | -        |  |
| <i>Lobelia stricklandiae</i> Gilliland           | Fisher & Thweicher 291 (S)                     | Zimbabwe     | -        | -        | -        | -        | -        | DQ356186 | -        |  |
| <i>Lobelia stricta</i> M. Martens & Galeotti     | Wilbur et al. 7849 (NY)                        | Dominica     | -        | -        | KU670738 | -        | DQ356141 | DQ356207 | -        |  |
| <i>Lobelia tomentosa</i> L. f.                   | Dahlstrand 2600(GB)                            | South Africa | -        | -        | -        | -        | EF141028 | DQ356180 | -        |  |
| <i>Lobelia viridiflora</i> McVaugh               | Weaver 910 (GH)                                | Jamaica      | -        | -        | KU670735 | -        | -        | -        | -        |  |
| <i>Lobelia xalapensis</i> Kunth                  | Santamaria S-1009 (GB)                         | Costa Rica   | -        | -        | -        | -        | DQ356144 | DQ356210 | -        |  |
| <i>Lobelia yuccoides</i> Hillebr.                | Cranwell et al. 2909 (GB)                      | Hawaii       | -        | -        | -        | -        | DQ356125 | DQ356190 | -        |  |
| <i>Lobelia zeylanica</i> L.                      | D. Boufford 24898 (GH)                         | Taiwan       | -        | -        | KP014310 | KP014573 | -        | -        | -        |  |
| <b>Pratia</b>                                    |                                                |              |          |          |          |          |          |          |          |  |
| <i>Pratia nummularia</i> (Lam.) A. Braun & Asch. | Andersson 2571 (GB)                            | Cultivated   | -        | -        | -        | -        | DQ356164 | DQ356235 | DQ356112 |  |
| <i>Pratia purpurascens</i> E. Wimm.              | Egerod s.n. (GB)                               | Australia    | -        | -        | -        | -        | DQ356160 | DQ356229 | DQ356107 |  |

***Siphocampylus* section *Hemisiphocampylus***

|                                                      |                                             |                    |          |          |          |          |          |   |   |
|------------------------------------------------------|---------------------------------------------|--------------------|----------|----------|----------|----------|----------|---|---|
| <i>Siphocampylus decumbens</i> (Rich.) Juss & A. DC. | P. Acevedo-Rodriguez 14172 (NY)             | Dominican Republic | KP014067 | -        | KP014330 | -        | -        | - | - |
| <i>Siphocampylus domingensis</i> A. DC.              | A. Veloz 2001 (JBSD)                        | Dominican Republic | KP014068 | KP014787 | KP014331 | KP014582 | -        | - | - |
| <i>Siphocampylus igneus</i> Urb.                     | J. R. Abbott 21003 (FLAS)                   | Dominican Republic | KP014069 | KP014788 | KP014332 | KP014779 | -        | - | - |
| <i>Siphocampylus manettiaeflorus</i> Hook.           | Cultivated, Marbury Bot. Garden, no voucher | Cultivated         | KP014074 | KP014786 | KP014334 | KP014780 | KU670799 | - | - |
| <i>Siphocampylus sonchifolius</i> (Sw.) McVaugh      | T. Clase 3048 (JBSD)                        | Dominican Republic | KP014070 | KP014789 | KP014333 | KP014778 | -        | - | - |

***Solenopsis***

|                                            |                         |            |   |   |   |   |          |          |   |
|--------------------------------------------|-------------------------|------------|---|---|---|---|----------|----------|---|
| <i>Solenopsis laurentia</i> (L.) C. Presl. | Dept.Syst.Bot. 381 (GB) | Cultivated | - | - | - | - | DQ356134 | DQ356199 | - |
|--------------------------------------------|-------------------------|------------|---|---|---|---|----------|----------|---|

***Trematolobelia***

|                                                           |                    |        |   |   |   |   |          |          |   |
|-----------------------------------------------------------|--------------------|--------|---|---|---|---|----------|----------|---|
| <i>Trematolobelia macrostachys</i> (Hook. & Arn.) Zahlbr. | Fagerlind 6872 (S) | Hawaii | - | - | - | - | DQ356137 | DQ356202 | - |
|-----------------------------------------------------------|--------------------|--------|---|---|---|---|----------|----------|---|

***Triodanis***

|                                          |                         |     |          |   |          |   |   |   |   |
|------------------------------------------|-------------------------|-----|----------|---|----------|---|---|---|---|
| <i>Triodanis perfoliata</i> (L.) Nieuwl. | L. Lagomarsino 425 (GH) | USA | KP014049 | - | KP014308 | - | - | - | - |
|------------------------------------------|-------------------------|-----|----------|---|----------|---|---|---|---|

Herbarium acronyms follow the Index Herbariorum. Taxa are organized alphabetically within the ingroup and outgroup categories

**Table S2. Divergence time estimation to assess sensitivity to dating method, calibration selection, and branch length heterogeneity.**

|                                                                   | <b>Campanulaceae</b>       | <b>Campanuloideae</b>      | <b>Lobelioideae</b>        | <b>Neotropical<br/>Lobelioideae</b> | <b><i>Lobelia</i> section<br/><i>Tupa</i></b> | <b><i>Lysipomia</i></b>   | <b>centropogonids</b>   |
|-------------------------------------------------------------------|----------------------------|----------------------------|----------------------------|-------------------------------------|-----------------------------------------------|---------------------------|-------------------------|
| <b>treePL dates from RAxML bootstrap trees</b>                    |                            |                            |                            |                                     |                                               |                           |                         |
| All priors                                                        | 58.19 (55.89–61.62)        | 56.13 (55.87–57.0)         | 54.98 (51.71–56.00)        | 20.15 (18.06–22.04)                 | 1.07 (0.36–1.35)                              | 13.05 (11.13–14.36)       | 5.12 (4.24–5.83)        |
| Three priors (fossil and secondary ages)                          | 57.15 (55.90–61.76)        | 55.93 (55.87–56.0)         | 55.03 (51.72–56.0)         | 20.24 (18.09–22.04)                 | 0.86 (0.34–1.33)                              | 13.08 (11.13–14.37)       | 5.32 (4.22–5.86)        |
| Two priors (fossil and root age)                                  | 66.89 (66.88–67.0)         | 65.41 (60.64–66.95)        | 64.65 (56.13–66.94)        | 24.73 (20.74–25.40)                 | 1.01 (0.15–1.20)                              | 15.21 (13.01–16.38)       | 6.22 (4.76–6.67)        |
| One prior (root age only)                                         | 66.69 (66.88–67.0)         | 65.34 (60.65–66.96)        | 63.66 (56.13–66.93)        | 23.58 (21.19–25.25)                 | 1.01 (0.147–1.20)                             | 15.3 (12.85–16.38)        | 6.24 (4.76–6.68)        |
| All priors, <i>Lysipomia</i> removed                              | 60.17 (55.98–62.09)        | 56 (55.87–56.0)            | 53.42 (50.96–56.12)        | 17.33 (13.97–18.31)                 | 0.34 (0.31–1.31)                              | N/A                       | 4.62 (4.14–5.45)        |
| <b>BEAST dates, all with expanded outgroup</b>                    |                            |                            |                            |                                     |                                               |                           |                         |
| All priors, exponential relaxed clock                             | 57.1 (44–69.55)            | 46.57 (36.28–56.39)        | 49.8 (35.88–65.20)         | 16.26 (9.44–22.51)                  | 0.9 (0.18–2.63)                               | 8.2 (4.70–13.06)          | 5.94 (3.32–9.54)        |
| <b>All priors, lognormal relaxed clock*</b>                       | <b>58.78 (49.87–68.04)</b> | <b>53.48 (45.60–62.11)</b> | <b>46.79 (39.07–55.07)</b> | <b>17.74 (14.32–20.32)</b>          | <b>1.35 (0.42–2.78)</b>                       | <b>11.69 (9.00–15.24)</b> | <b>4.98 (3.95–6.13)</b> |
| Three priors (fossil and secondary ages), lognormal relaxed clock | 59.2 (46.81–72.03)         | 48.55 (38.38–59.31)        | 51.78 (37.87–66.55)        | 16.07 (10.54–22.32)                 | 0.95 (0.22–2.75)                              | 8.97 (5.08–13.83)         | 6.55 (3.74–9.95)        |
| Two priors (fossil and root age), lognormal relaxed clock         | 62.47 (48.31–76.38)        | 53.23 (39.67–68.62)        | 51.52 (34.62–69.17)        | 17.78 (9.69–24.49)                  | 0.97 (0.30–2.90)                              | 9.24 (5.03–13.89)         | 6.71 (3.87–10.46)       |
| One prior (root age only), lognormal relaxed clock                | 53.4 (35.61–69.51)         | 20.33 (9.69–34.34)         | 43.62 (19.68–57.10)        | 12.11 (6.27–18.80)                  | 0.68 (0.10–2.17)                              | 6.37 (2.84–9.89)          | 4.77 (2.25–7.67)        |
| All priors, <i>Lysipomia</i> removed                              | 58.77 (47.0–71.94)         | 49.16 (37.82–59.07)        | 50.05 (35.34–66.99)        | 11.8 (6.93–17.63)                   | 0.85 (0.15–0.86)                              | N/A                       | 6.11 (3.78–9.47)        |

Analysis in boldface denoted with an asterisk is the one presented in the main text and used in subsequent diversification analyses. Age estimates reported for major clades relevant to the study reported in million years (Ma). Root node = crown group Campanulaceae.

**Table S3. Trait codings for the four traits used in our BiSSE analyses.**

|                                                                     | Andean<br>Distribution | Elevation | Fruit | Pollinator |
|---------------------------------------------------------------------|------------------------|-----------|-------|------------|
| <i>Burmeistera almedae</i> Wilbur                                   | 0                      | 1         | 1     | 1          |
| <i>Burmeistera</i> aff. <i>bullatifolia</i> J. Garzón & F. Gonzalez | 1                      | 1         | 1     | 1          |
| <i>Burmeistera</i> aff. <i>bullatifolia</i> J. Garzón & F. Gonzalez | 1                      | 1         | 1     | 1          |
| <i>Burmeistera ceratocarpa</i> Zahlb.                               | 1                      | 0         | 1     | 1          |
| <i>Burmeistera chiriquiensis</i> Wilbur                             | 0                      | 1         | 1     | 1          |
| <i>Burmeistera crebra</i> McVaugh                                   | 0                      | 1         | 1     | 1          |
| <i>Burmeistera cyclostigmata</i> J. D. Smith                        | 0                      | 1         | 1     | 1          |
| <i>Burmeistera dendrophila</i> E. Wimm                              | 0                      | 1         | 1     | 1          |
| <i>Burmeistera domingensis</i> Jeppesen                             | 1                      | 0         | 1     | 1          |
| <i>Burmeistera fuchsioides</i> J. Garzón & F. Gonzalez              | 1                      | 1         | 1     | 1          |
| <i>Burmeistera mcvaughii</i> Wilbur                                 | 0                      | 1         | 1     | 1          |
| <i>Burmeistera mcvaughii</i> Wilbur                                 | 0                      | 1         | 1     | 1          |
| <i>Burmeistera microphylla</i> J. D. Smith                          | 0                      | 0         | 1     | 1          |
| <i>Burmeistera</i> aff. <i>minutiflora</i> J. Garzón & F. Gonzalez  | 1                      | 1         | 1     | 0          |
| <i>Burmeistera morii</i> Wilbur                                     | 0                      | 0         | 1     | 1          |
| <i>Burmeistera multiflora</i> Zahlb.                                | 1                      | 0         | 1     | 1          |
| <i>Burmeistera obtusifolia</i> E. Wimm                              | 0                      | 1         | 1     | 1          |
| <i>Burmeistera obtusifolia</i> E. Wimm                              | 0                      | 1         | 1     | 1          |
| <i>Burmeistera parviflora</i> E. Wimm                               | 0                      | 1         | 1     | 0          |
| <i>Burmeistera racemiflora</i> Lammers                              | 1                      | 0         | 1     | 1          |
| <i>Burmeistera refracta</i> E. Wimm.                                | 1                      | 0         | 1     | 1          |
| <i>Burmeistera refracta</i> E. Wimm.                                | 1                      | 0         | 1     | 1          |
| <i>Burmeistera sodiroana</i> Zahlb.                                 | 1                      | 1         | 1     | 1          |
| <i>Burmeistera succulenta</i> H. Karst. & Triana                    | 1                      | 0         | 1     | 1          |
| <i>Burmeistera tenuiflora</i> J.D. Smith                            | 0                      | 0         | 1     | 1          |
| <i>Burmeistera toroensis</i> Wilbur                                 | 0                      | 0         | 1     | 1          |
| <i>Burmeistera truncata</i> Zahlbr.                                 | 1                      | 0         | 1     | 1          |
| <i>Burmeistera utleyi</i> Wilbur                                    | 0                      | 1         | 1     | 1          |
| <i>Burmeistera variabilis</i> (Gleason) E. Wimm.                    | 1                      | 0         | 1     | 1          |
| <i>Burmeistera vulgaris</i> E. Wimm.                                | 0                      | 0         | 1     | 1          |
| <i>Burmeistera zurquiensis</i> Wilbur                               | 0                      | 1         | 1     | 1          |
| <i>Burmeistera</i> sp.                                              | 1                      | 1         | 1     | 1          |
| <i>Burmeistera</i> sp. nov.                                         | 0                      | 1         | 1     | 0          |

|                                                                           |   |   |   |   |
|---------------------------------------------------------------------------|---|---|---|---|
| <i>Centropogon aequatorialis</i> E. Wimm.                                 | 1 | 1 | 1 | 1 |
| <i>Centropogon argutus</i> E. Wimm.                                       | 1 | 1 | 1 | 1 |
| <i>Centropogon asclepiadeus</i> (Willd.) E. Wimm.                         | 1 | 1 | 1 | 1 |
| <i>Centropogon azuayensis</i> Jeppesen                                    | 1 | 1 | 1 | 1 |
| <i>Centropogon baezanus</i> Jeppesen                                      | 1 | 1 | 1 | 1 |
| <i>Centropogon bangii</i> Zahlb.                                          | 1 | 0 | 1 | 1 |
| <i>Centropogon brittonianus</i> Zahlb.                                    | 1 | 1 | 1 | 1 |
| <i>Centropogon coccineus</i> (Hook.) Regel ex B.D. Jacks.                 | 0 | 0 | 1 | 1 |
| <i>Centropogon comosus</i> Gleason                                        | 1 | 1 | 1 | 1 |
| <i>Centropogon congestus</i> Gleason                                      | 0 | 0 | 1 | 1 |
| <i>Centropogon cordifolius</i> Benth.                                     | 0 | 0 | 1 | 1 |
| <i>Centropogon cornutus</i> (L.) Druce                                    | 0 | 0 | 1 | 1 |
| <i>Centropogon costaricae</i> (Vatke) E. Wimm.                            | 0 | 1 | 1 | 1 |
| <i>Centropogon diana</i> Lambers                                          | 1 | 1 | 1 | 1 |
| <i>Centropogon dissectus</i> E. Wimm.                                     | 1 | 1 | 1 | 1 |
| <i>Centropogon dombeyanus</i> E. Wimm.                                    | 1 | 1 | 1 | 1 |
| <i>Centropogon eilersii</i> Lambers & M.O. Dillon                         | 1 | 1 | 1 | 1 |
| <i>Centropogon erythraeus</i> Drake                                       | 1 | 1 | 1 | 1 |
| <i>Centropogon featherstonei</i> Gleason                                  | 1 | 1 | 1 | 1 |
| <i>Centropogon ferrugineus</i> (L.f) Gleason                              | 0 | 1 | 1 | 1 |
| <i>Centropogon ferrugineus</i> (L.f) Gleason                              | 0 | 1 | 1 | 1 |
| <i>Centropogon ferrugineus</i> (L.f) Gleason                              | 0 | 1 | 1 | 1 |
| <i>Centropogon foetidus</i> (Kunth) E. Wimm.                              | 1 | 1 | 1 | 1 |
| <i>Centropogon gamosepalus</i> Zahlb.                                     | 1 | 0 | 1 | 1 |
| <i>Centropogon glabrifilis</i> (E. Wimm.) Jeppesen                        | 1 | 1 | 1 | 1 |
| <i>Centropogon gloriosus</i> (Britton) Zahlb.                             | 1 | 1 | 1 | 1 |
| <i>Centropogon grandidentatus</i> (Schltdl.) Zahlbr.                      | 0 | 0 | 1 | 1 |
| <i>Centropogon granulosus</i> subsp. <i>granulosus</i> Stein<br>(ined.) 1 | 1 | 0 | 1 | 1 |
| <i>Centropogon granulosus</i> subsp. <i>granulosus</i> Stein<br>(ined.) 2 | 1 | 0 | 1 | 1 |
| <i>Centropogon granulosus</i> subsp. <i>lugens</i> Stein (ined)           | 1 | 0 | 1 | 1 |
| <i>Centropogon granulosus</i> subsp. <i>nutans</i> Stein (ined.)          | 0 | 0 | 1 | 1 |
| <i>Centropogon granulosus</i> subsp. <i>tortilis</i> Stein (ined.)        | 0 | 0 | 1 | 1 |
| <i>Centropogon granulosus</i> C. Presl. 1                                 | 1 | 0 | 1 | 1 |
| <i>Centropogon granulosus</i> C. Presl. 2                                 | 0 | 0 | 1 | 1 |

|                                                           |   |   |   |   |
|-----------------------------------------------------------|---|---|---|---|
| <i>Centropogon granulosus</i> C. Presl. 3                 | 0 | 0 | 1 | 1 |
| <i>Centropogon granulosus</i> C. Presl. 4                 | 0 | 0 | 1 | 1 |
| <i>Centropogon gutierrezii</i> (Planch & Oerst.) E. Wimm. | 0 | 1 | 1 | 1 |
| <i>Centropogon hirtus</i> (Cav.) C. Presl.                | 1 | 1 | 1 | 1 |
| <i>Centropogon incanus</i> (Britton) Zahlb.               | 1 | 1 | 1 | 1 |
| <i>Centropogon incanus</i> (Britton) Zahlbr..             | 1 | 1 | 1 | 1 |
| <i>Centropogon isabellinus</i> E. Wimm.                   | 1 | 1 | 1 | 1 |
| <i>Centropogon leucocarpus</i> McVaugh                    | 0 | 1 | 1 | 1 |
| <i>Centropogon llanganatensis</i> Jeppsen                 | 1 | 1 | 1 | 1 |
| <i>Centropogon luteus</i> E. Wimm.                        | 1 | 1 | 1 | 1 |
| <i>Centropogon luteynii</i> Wilbur                        | 0 | 1 | 1 | 1 |
| <i>Centropogon macbridei</i> Gleason                      | 1 | 1 | 1 | 1 |
| <i>Centropogon macrocarpus</i> Zahlb.                     | 1 | 1 | 1 | 1 |
| <i>Centropogon macrophyllus</i> (G. Don.) E. Wimm         | 1 | 0 | 1 | 1 |
| <i>Centropogon magnificus</i> Zahlb.                      | 1 | 1 | 1 | 1 |
| <i>Centropogon mandonis</i> Zahlb.                        | 1 | 1 | 1 | 1 |
| <i>Centropogon mandonis</i> Zahlb.                        | 1 | 1 | 1 | 1 |
| <i>Centropogon medusa</i> E. Wimm.                        | 1 | 1 | 1 | 1 |
| <i>Centropogon minimus</i> McVaugh                        | 1 | 1 | 1 | 1 |
| <i>Centropogon nervosus</i> Wimm                          | 1 | 1 | 1 | 1 |
| <i>Centropogon nigricans</i> Zahlb.                       | 1 | 1 | 1 | 1 |
| <i>Centropogon nigricans</i> Zahlb.                       | 1 | 1 | 1 | 1 |
| <i>Centropogon palmanus</i> (J. D. Smith) E. Wimm.        | 0 | 0 | 1 | 1 |
| <i>Centropogon panamensis</i> Wilbur                      | 0 | 0 | 1 | 1 |
| <i>Centropogon perlongus</i> Gleason                      | 1 | 1 | 1 | 1 |
| <i>Centropogon peruvianus</i> (E. Wimm.) McVaugh          | 1 | 1 | 1 | 1 |
| <i>Centropogon pichinchensis</i> Zahlb.                   | 1 | 1 | 1 | 1 |
| <i>Centropogon preslii</i> E. Wimm.                       | 1 | 1 | 1 | 1 |
| <i>Centropogon pulcher</i> Zahlb.                         | 1 | 0 | 1 | 1 |
| <i>Centropogon reticulatus</i> Drake                      | 1 | 1 | 1 | 1 |
| <i>Centropogon rex</i> E. Wimm.                           | 1 | 1 | 1 | 1 |
| <i>Centropogon roseus</i> Rusby                           | 1 | 0 | 1 | 1 |
| <i>Centropogon salviaeformis</i> Zahlb.                   | 1 | 1 | 1 | 1 |
| <i>Centropogon simulans</i> Lammers                       | 1 | 1 | 1 | 1 |
| <i>Centropogon smithii</i> E. Wimm.                       | 0 | 1 | 1 | 1 |
| <i>Centropogon sodiroanus</i> Zahlb.                      | 1 | 1 | 1 | 1 |

|                                                       |   |   |   |   |
|-------------------------------------------------------|---|---|---|---|
| <i>Centropogon solanifolius</i> Benth. 1              | 1 | 1 | 1 | 1 |
| <i>Centropogon solanifolius</i> Benth. 2              | 0 | 1 | 1 | 1 |
| <i>Centropogon solanifolius</i> Benth. 3              | 0 | 1 | 1 | 1 |
| <i>Centropogon subandinus</i> Zahlb.                  | 1 | 1 | 1 | 1 |
| <i>Centropogon talamancensis</i> Wilbur               | 0 | 1 | 1 | 1 |
| <i>Centropogon tessmannii</i> E. Wimm.                | 1 | 0 | 1 | 1 |
| <i>Centropogon trachyanthus</i> E. Wimm.              | 1 | 1 | 1 | 1 |
| <i>Centropogon trichodes</i> E. Wimm.                 | 1 | 1 | 1 | 1 |
| <i>Centropogon umbrosus</i> E. Wimm                   | 1 | 1 | 1 | 1 |
| <i>Centropogon unduavensis</i> (Britton) Zahlb.       | 1 | 1 | 1 | 1 |
| <i>Centropogon urubambae</i> E. Wimm                  | 1 | 0 | 1 | 1 |
| <i>Centropogon valerii</i> Standley                   | 0 | 1 | 1 | 1 |
| <i>Centropogon Vargasii</i> B. A. Stein (ined.)       | 1 | 1 | 1 | 1 |
| <i>Centropogon viriduliflorus</i> Wimm                | 1 | 1 | 1 | 1 |
| <i>Centropogon viriduliflorus</i> Wimm                | 1 | 1 | 1 | 1 |
| <i>Centropogon weberbaueri</i> Zahlb.                 | 1 | 1 | 1 | 1 |
| <i>Centropogon</i> cf. <i>weberbaueri</i> Zahlb.      | 1 | 1 | 1 | 1 |
| <i>Centropogon yarumalensis</i> E. Wimm.              | 1 | 1 | 1 | 1 |
| <i>Centropogon yungasensis</i> Britton                | 1 | 1 | 1 | 1 |
| <i>Centropogon</i> sp. nov. (Lagom. & Santam. ined.)  | 1 | 1 | 1 | 1 |
| <i>Centropogon</i> sp.                                | 1 | 1 | 1 | 1 |
| <i>Lobelia bridgesii</i> Hook & Arn.                  | 1 | 0 | 0 | 1 |
| <i>Lobelia excelsa</i> Bonpland                       | 1 | 0 | 0 | 1 |
| <i>Lobelia polyphylla</i> Hook. & Arn.                | 1 | 0 | 0 | 1 |
| <i>Lobelia tupa</i> L.                                | 1 | 0 | 0 | 1 |
| <i>Lysipomia cuspidata</i> McVaugh                    | 1 | 1 | 0 | 0 |
| <i>Lysipomia muscoides</i> Hook f.                    | 1 | 1 | 0 | 0 |
| <i>Lysipomia pumila</i> (Wedd.) E. Wimm.              | 1 | 1 | 0 | 0 |
| <i>Lysipomia sphagnophila</i> Griseb. Ex Wedd.        | 1 | 1 | 0 | 0 |
| <i>Lysipomia vitreola</i> McVaugh                     | 1 | 1 | 0 | 0 |
| <i>Siphocampylus actinothrix</i> E. Wimm.             | 1 | 1 | 0 | 1 |
| <i>Siphocampylus</i> aff. <i>actinothrix</i> E. Wimm. | 1 | 1 | 0 | 1 |
| <i>Siphocampylus affinis</i> (Mirb.) McVaugh          | 1 | 1 | 0 | 1 |
| <i>Siphocampylus ambivalens</i> Lammers               | 1 | 1 | 0 | 1 |
| <i>Siphocampylus andinus</i> Britton                  | 1 | 1 | 0 | 1 |
| <i>Siphocampylus angustiflorus</i> Schlechtend.       | 1 | 1 | 0 | 1 |

|                                                          |   |   |   |   |
|----------------------------------------------------------|---|---|---|---|
| <i>Siphocampylus antioquianus</i> E. Wimm.               | 1 | 1 | 0 | 1 |
| <i>Siphocampylus aureus</i> Rusby                        | 1 | 0 | 0 | 1 |
| <i>Siphocampylus ayersiae</i> Lammers                    | 1 | 1 | 0 | 1 |
| <i>Siphocampylus betulaefolius</i> (Cham.) G. Don.       | 0 | 0 | 0 | 1 |
| <i>Siphocampylus bilabiatus</i> Zahlb.                   | 1 | 0 | 0 | 1 |
| <i>Siphocampylus boliviensis</i> Zahlb.                  | 1 | 1 | 0 | 1 |
| <i>Siphocampylus brevicalyx</i> E. Wimm.                 | 1 | 1 | 0 | 1 |
| <i>Siphocampylus chloroleucus</i> E. Wimm                | 1 | 1 | 0 | 1 |
| <i>Siphocampylus citrinus</i> E. Wimm                    | 1 | 1 | 0 | 1 |
| <i>Siphocampylus clotho</i> E. Wimm.                     | 1 | 1 | 0 | 1 |
| <i>Siphocampylus convolvulaceus</i> (Cham.) G. Don.      | 0 | 0 | 0 | 1 |
| <i>Siphocampylus correoides</i> Zahlb.                   | 1 | 1 | 0 | 1 |
| <i>Siphocampylus corymbifer</i> Pohl                     | 1 | 0 | 0 | 1 |
| <i>Siphocampylus corymbifer</i> Pohl                     | 1 | 0 | 0 | 1 |
| <i>Siphocampylus corymbifer</i> Pohl                     | 1 | 0 | 0 | 1 |
| <i>Siphocampylus corynoides</i> E. Wimm                  | 1 | 1 | 0 | 1 |
| <i>Siphocampylus dependens</i> (Ruiz & Pavon) G. Don     | 1 | 1 | 0 | 1 |
| <i>Siphocampylus elfriedii</i> E. Wimm                   | 1 | 1 | 0 | 1 |
| <i>Siphocampylus fiebrigii</i> E. Wimm                   | 1 | 0 | 0 | 1 |
| <i>Siphocampylus flagelliformis</i> Zahlb.               | 1 | 1 | 0 | 1 |
| <i>Siphocampylus flagelliformis</i> Zahlb.               | 1 | 1 | 0 | 1 |
| <i>Siphocampylus fulgens</i> Hort.                       | 0 | 0 | 0 | 1 |
| <i>Siphocampylus giganteus</i> (Cav.) G. Don.            | 1 | 1 | 0 | 1 |
| <i>Siphocampylus giganteus</i> (Cav.) G. Don.            | 1 | 1 | 0 | 1 |
| <i>Siphocampylus imbricatus</i> (Cham.) G. Don.          | 0 | 0 | 0 | 1 |
| <i>Siphocampylus jelskii</i> Zahlb.                      | 1 | 1 | 0 | 1 |
| <i>Siphocampylus krauseanus</i> E. Wimm.                 | 1 | 1 | 0 | 1 |
| <i>Siphocampylus longipedunculatus</i> Pohl              | 0 | 0 | 0 | 1 |
| <i>Siphocampylus lycioides</i> (Cham.) G. Don.           | 0 | 0 | 0 | 1 |
| <i>Siphocampylus macropodus</i> (Billb.) G. Don.         | 0 | 0 | 0 | 1 |
| <i>Siphocampylus matthiaei</i> A. DC.                    | 1 | 1 | 0 | 1 |
| <i>Siphocampylus membraceus</i> Britton                  | 1 | 0 | 0 | 1 |
| <i>Siphocampylus nematosepalus</i> (Donn. Smith) E. Wimm | 0 | 1 | 0 | 1 |
| <i>Siphocampylus nemoralis</i> Griseb.                   | 1 | 1 | 0 | 1 |
| <i>Siphocampylus neurotrichus</i> E. Wimm                | 1 | 0 | 0 | 1 |



|                                                          |   |   |   |   |
|----------------------------------------------------------|---|---|---|---|
| <i>Siphocampylus nitidus</i> Pohl                        | 0 | 0 | 0 | 1 |
| <i>Siphocampylus oblongifolius</i> Rusby                 | 1 | 0 | 0 | 1 |
| <i>Siphocampylus oblongifolius</i> Rusby                 | 1 | 0 | 0 | 1 |
| <i>Siphocampylus obovatus</i> (G. Don) E. Wimm           | 1 | 1 | 0 | 1 |
| <i>Siphocampylus orbignianus</i> A. DC.                  | 1 | 0 | 0 | 1 |
| <i>Siphocampylus puberulus</i> E. Wimm                   | 1 | 1 | 0 | 1 |
| <i>Siphocampylus pubescens</i> Benth.                    | 1 | 1 | 0 | 1 |
| <i>Siphocampylus</i> aff. <i>rictus</i> Lammers          | 1 | 1 | 0 | 1 |
| <i>Siphocampylus rosmarinifolius</i> G. Don.             | 1 | 1 | 0 | 1 |
| <i>Siphocampylus rusbyanus</i> Britton                   | 1 | 1 | 0 | 1 |
| <i>Siphocampylus scandens</i> (HBK) G. Don.              | 1 | 1 | 0 | 1 |
| <i>Siphocampylus sceptrum</i> Decaisne apud Linden       | 1 | 1 | 0 | 1 |
| <i>Siphocampylus smilax</i> Lammers                      | 1 | 0 | 0 | 1 |
| <i>Siphocampylus sparsipilus</i> E. Wimm                 | 1 | 1 | 0 | 1 |
| <i>Siphocampylus tunarensis</i> Zahlb.                   | 1 | 1 | 0 | 1 |
| <i>Siphocampylus tunicatus</i> Zahlb.                    | 1 | 1 | 0 | 1 |
| <i>Siphocampylus tupaeformis</i> Zahlb.                  | 1 | 1 | 0 | 1 |
| <i>Siphocampylus umbellatus</i> (HBK) G. Don.            | 1 | 1 | 0 | 1 |
| <i>Siphocampylus vatkeanus</i> Zahlb.                    | 1 | 1 | 0 | 1 |
| <i>Siphocampylus veteranus</i> Wimm                      | 1 | 1 | 0 | 1 |
| <i>Siphocampylus virgatus</i> A. DC.                     | 1 | 0 | 0 | 1 |
| <i>Siphocampylus werdermannii</i> E. Wimm                | 1 | 1 | 0 | 1 |
| <i>Siphocampylus westinianus</i> (Billb.) Pohl           | 0 | 0 | 0 | 1 |
| <i>Siphocampylus</i> sp.                                 | 1 | 1 | 0 | 1 |
| <i>Siphocampylus</i> sp. nov. 1 (Lagom. & Santam. ined.) | 1 | 1 | 0 | 1 |
| <i>Siphocampylus</i> sp. nov. 2 (Lagom. & Santam. ined.) | 1 | 1 | 0 | 1 |

Character States are as follows: Andean Distribution— 0= extra-Andean, 1= Andean; Elevation— 0= Low elevation (<1900m), 1= High elevation (>1900 m); Fruit— 0= Capsule, 1= Berry; Pollinator— 0= Invertebrate, 1= Vertebrate

**Table S4. Paleoenvironmental-dependent diversification analyses using paleoaltimetry (a) and Cenozoic climate data (b).**

**a) Paleoaltitude-dependence diversification models**

| <b>Models</b>                                             | <b>Mode of dependency</b> | <b>NP</b> | <b>logL</b>     | <b>AICc</b>    | <b><math>\Delta</math>AIC</b> | <b><i>P</i> (LRT)</b> | <b><math>\lambda</math></b> | <b><math>\alpha</math></b> | <b><math>\mu</math></b> | <b><math>\beta</math></b> |
|-----------------------------------------------------------|---------------------------|-----------|-----------------|----------------|-------------------------------|-----------------------|-----------------------------|----------------------------|-------------------------|---------------------------|
| $\lambda$ constant (no $\mu$ ) (Yule)                     | -                         | 1         | -313.082        | 628.184        | 89.408                        | <0.001                | 1.016                       | -                          | -                       | -                         |
| $\lambda$ and $\mu$ constant                              | -                         | 2         | -276.699        | 557.458        | 18.682                        | <0.001                | 2.915                       | -                          | -                       | -                         |
| <b><math>\lambda</math> Alti. and no <math>\mu</math></b> | <b>Exponential</b>        | <b>2</b>  | <b>-267.358</b> | <b>538.776</b> | <b>0</b>                      | <b>Best</b>           | <b>0.0010</b>               | <b>0.00249</b>             | <b>-</b>                | <b>-</b>                  |
| $\lambda$ Alti. and $\mu$ constant                        | Exponential               | 3         | -266.863        | 539.848        | 1.072                         | 0.3197                | 0.0004                      | 0.00258                    | 0.0184                  | -                         |
| $\lambda$ constant and $\mu$ Alti.                        | Exponential               | 3         | -271.228        | 548.578        | 9.802                         | 0.999                 | 2.3894                      | -                          | 6.1267                  | -0.00026                  |
| $\lambda$ Alti. and $\mu$ Alti.                           | Exponential               | 4         | -266.523        | 541.250        | 2.474                         | 0.4339                | 0.0016                      | 0.00213                    | 0.0611                  | -0.03312                  |
| $\lambda$ Alti. and no $\mu$                              | Linear                    | 2         | -281.176        | 566.413        | 27.637                        | 0.999                 | 2.1972                      | -0.00077                   | -                       | -                         |
| $\lambda$ Alti. and $\mu$ constant                        | Linear                    | 3         | -268.544        | 543.211        | 4.435                         | 0.999                 | 2.3254                      | -0.00094                   | 0.9437                  | -                         |
| $\lambda$ constant and $\mu$ Alti.                        | Linear                    | 3         | -271.499        | 549.120        | 10.344                        | 0.999                 | 2.1654                      | -                          | 4.1010                  | -0.00065                  |
| $\lambda$ Alti. and $\mu$ Alti.                           | Linear                    | 4         | -270.284        | 548.773        | 9.997                         | 0.999                 | 2.7205                      | 0.00011                    | 1.7161                  | -0.00013                  |

## b) Temperature-dependence diversification models

| Models                                                          | Mode of dependency | NP       | logL            | AICc           | $\Delta$ AIC | $P$ (LRT)   | $\lambda$     | $\alpha$ | $\mu$         | $\beta$        |
|-----------------------------------------------------------------|--------------------|----------|-----------------|----------------|--------------|-------------|---------------|----------|---------------|----------------|
| $\lambda$ constant (no $\mu$ ) (Yule)                           | -                  | 1        | -313.082        | 628.184        | 92.14        | <0.001      | 1.016         | -        | -             | -              |
| $\lambda$ and $\mu$ constant                                    | -                  | 2        | -276.699        | 557.458        | 21.414       | <0.001      | 2.915         | -        | -             | -              |
| $\lambda$ Temp. and no $\mu$                                    | Exponential        | 2        | -268.613        | 541.286        | 5.242        | 0.999       | 2.7463        | -0.43320 | -             | -              |
| $\lambda$ Temp. and $\mu$ constant                              | Exponential        | 3        | -265.353        | 536.829        | 0.785        | 0.999       | 2.5085        | -0.14360 | 1.0536        | -              |
| $\lambda$ constant and $\mu$ Temp.                              | Exponential        | 3        | -265.248        | 536.619        | 0.575        | 0.999       | 2.2038        | -        | 1.2030        | 0.10578        |
| $\lambda$ Temp. and $\mu$ Temp.                                 | Exponential        | 4        | -264.955        | 538.114        | 2.070        | 0.9128      | 2.2776        | -0.05523 | 1.0695        | 0.07642        |
| $\lambda$ Temp. and no $\mu$                                    | Linear             | 2        | -272.381        | 548.824        | 12.779       | 0.999       | 1.6588        | -0.23915 | -             | -              |
| $\lambda$ Temp. and $\mu$ constant                              | Linear             | 3        | -265.748        | 537.618        | 1.573        | 0.999       | 2.1378        | -0.26233 | 0.6189        | -              |
| <b><math>\lambda</math> constant and <math>\mu</math> Temp.</b> | <b>Linear</b>      | <b>3</b> | <b>-264.961</b> | <b>536.044</b> | <b>0</b>     | <b>Best</b> | <b>2.1238</b> | <b>-</b> | <b>0.9730</b> | <b>0.20179</b> |
| $\lambda$ Temp. and $\mu$ Temp.                                 | Linear             | 4        | -264.575        | 537.355        | 1.310        | 0.3796      | 1.7996        | 0.28453  | 0.7834        | 0.47501        |

Mean parameter estimates presented for each model. Best-fitting model, as determined via a combination of the Akaike Information Criterion and likelihood ratio tests (see main text) highlighted in red and boldface. In our best-fit paleoaltitude-dependent model, speciation is positively exponentially correlated to Andean orogeny over time; adding extinction as a parameter did not improve model fit. Likewise, extinction is positively linearly correlated to temperature variation over time; allowing speciation to vary with temperature did not improve model fit.  $\lambda$  = speciation rate (in events/Ma/lineage);  $\mu$  = extinction rate (in events/Ma/lineage);  $\alpha$  = rate of variation of the speciation according to the relevant paleoenvironmental variable;  $\beta$  = rate of variation of the extinction according to the paleoenvironmental variable; NP: number of parameters in each model.

**Table S5. Model comparison for the four BiSSE analyses presented in the main text.**

| <b>Andes (0: extra-Andean; 1: Andean)</b>                                                                           |          |                 |                |             |                |                      |                      |                      |                      |                       |                       |
|---------------------------------------------------------------------------------------------------------------------|----------|-----------------|----------------|-------------|----------------|----------------------|----------------------|----------------------|----------------------|-----------------------|-----------------------|
| <b>Model</b>                                                                                                        | <b>N</b> | <b>LogL</b>     | <b>AICc</b>    | <b>ΔAIC</b> | <b>P (LRT)</b> | <b>λ<sub>0</sub></b> | <b>λ<sub>1</sub></b> | <b>μ<sub>0</sub></b> | <b>μ<sub>1</sub></b> | <b>q<sub>01</sub></b> | <b>q<sub>10</sub></b> |
| Null model<br>(λ <sub>0</sub> =λ <sub>1</sub> ; μ <sub>0</sub> =μ <sub>1</sub> ; q <sub>01</sub> =q <sub>10</sub> ) | 3        | -361.737        | 729.597        | 15.332      | 0.99           | 2.932                | 2.932                | 2.592                | 2.592                | 0.084                 | 0.084                 |
| λ <sub>0</sub> ≠λ <sub>1</sub> ; μ <sub>0</sub> =μ <sub>1</sub> ; q <sub>01</sub> =q <sub>10</sub>                  | 4        | -354.666        | 717.537        | 3.271       | 0.99           | 1.908                | 2.541                | 1.818                | 1.818                | 0.089                 | 0.089                 |
| λ <sub>0</sub> =λ <sub>1</sub> ; μ <sub>0</sub> ≠μ <sub>1</sub> ; q <sub>01</sub> =q <sub>10</sub>                  | 4        | -357.126        | 722.457        | 8.192       | 0.99           | 2.713                | 2.713                | 2.621                | 2.164                | 0.102                 | 0.102                 |
| λ <sub>0</sub> =λ <sub>1</sub> ; μ <sub>0</sub> =μ <sub>1</sub> ; q <sub>01</sub> ≠q <sub>10</sub>                  | 4        | -359.261        | 726.726        | 12.460      | 0.99           | 2.924                | 2.924                | 2.583                | 2.583                | 0.273                 | 0.077                 |
| <b>λ<sub>0</sub>≠λ<sub>1</sub>; μ<sub>0</sub>≠μ<sub>1</sub>; q<sub>01</sub>=q<sub>10</sub></b>                      | <b>5</b> | <b>-351.978</b> | <b>714.266</b> | <b>0</b>    | <b>Best</b>    | <b>1.267</b>         | <b>2.975</b>         | <b>1.152</b>         | <b>2.275</b>         | <b>2.275</b>          | <b>2.275</b>          |
| λ <sub>0</sub> ≠λ <sub>1</sub> ; μ <sub>0</sub> =μ <sub>1</sub> ; q <sub>01</sub> ≠q <sub>10</sub>                  | 5        | -352.912        | 716.133        | 1.867       | 0.99           | 1.690                | 2.477                | 1.636                | 1.636                | 0.043                 | 0.109                 |
| λ <sub>0</sub> =λ <sub>1</sub> ; μ <sub>0</sub> ≠μ <sub>1</sub> ; q <sub>01</sub> ≠q <sub>10</sub>                  | 5        | -354.944        | 720.197        | 5.931       | 0.99           | 2.348                | 2.348                | 2.305                | 1.510                | 0.031                 | 0.123                 |
| λ <sub>0</sub> ≠λ <sub>1</sub> ; μ <sub>0</sub> ≠μ <sub>1</sub> ; q <sub>01</sub> ≠q <sub>10</sub>                  | 6        | -351.892        | 716.219        | 1.953       | 0.678          | 1.292                | 2.938                | 1.184                | 2.224                | 0.081                 | 0.088                 |
| <b>Elevation (0: low; 1: high)</b>                                                                                  |          |                 |                |             |                |                      |                      |                      |                      |                       |                       |
| <b>Model</b>                                                                                                        | <b>N</b> | <b>LogL</b>     | <b>AICc</b>    | <b>ΔAIC</b> | <b>P (LRT)</b> | <b>λ<sub>0</sub></b> | <b>λ<sub>1</sub></b> | <b>μ<sub>0</sub></b> | <b>μ<sub>1</sub></b> | <b>q<sub>01</sub></b> | <b>q<sub>10</sub></b> |
| Null model (λ <sub>0</sub> =λ <sub>1</sub> ;<br>μ <sub>0</sub> =μ <sub>1</sub> ; q <sub>01</sub> =q <sub>10</sub> ) | 3        | -370.173        | 746.468        | 16.468      | 0.99           | 2.994                | 2.994                | 2.656                | 2.656                | 0.175                 | 0.175                 |
| λ <sub>0</sub> ≠λ <sub>1</sub> ; μ <sub>0</sub> =μ <sub>1</sub> ; q <sub>01</sub> =q <sub>10</sub>                  | 4        | -365.927        | 740.060        | 10.060      | 0.99           | 2.554                | 2.973                | 2.465                | 2.465                | 0.209                 | 0.209                 |
| λ <sub>0</sub> =λ <sub>1</sub> ; μ <sub>0</sub> ≠μ <sub>1</sub> ; q <sub>01</sub> =q <sub>10</sub>                  | 4        | -367.173        | 742.551        | 12.551      | 0.99           | 2.944                | 2.944                | 2.822                | 2.480                | 0.206                 | 0.206                 |
| λ <sub>0</sub> =λ <sub>1</sub> ; μ <sub>0</sub> =μ <sub>1</sub> ; q <sub>01</sub> ≠q <sub>10</sub>                  | 4        | -367.360        | 742.924        | 12.924      | 0.99           | 2.989                | 2.989                | 2.650                | 2.650                | 0.353                 | 0.119                 |
| λ <sub>0</sub> ≠λ <sub>1</sub> ; μ <sub>0</sub> ≠μ <sub>1</sub> ; q <sub>01</sub> =q <sub>10</sub>                  | 5        | -360.316        | 730.942        | 0.942       | 0.99           | 0.963                | 3.566                | 0.740                | 2.876                | 2.876                 | 2.876                 |
| <b>λ<sub>0</sub>≠λ<sub>1</sub>; μ<sub>0</sub>=μ<sub>1</sub>; q<sub>01</sub>≠q<sub>10</sub></b>                      | <b>5</b> | <b>-359.845</b> | <b>730.000</b> | <b>0</b>    | <b>Best</b>    | <b>1.418</b>         | <b>2.427</b>         | <b>1.349</b>         | <b>1.349</b>         | <b>0.034</b>          | <b>0.274</b>          |
| λ <sub>0</sub> =λ <sub>1</sub> ; μ <sub>0</sub> ≠μ <sub>1</sub> ; q <sub>01</sub> ≠q <sub>10</sub>                  | 5        | -362.785        | 735.880        | 5.880       | 0.99           | 2.244                | 2.244                | 2.193                | 1.177                | 0.024                 | 0.300                 |

|                                                                                 |                |                 |                |                                                                                                                 |                |                               |                               |                           |                           |                            |                            |
|---------------------------------------------------------------------------------|----------------|-----------------|----------------|-----------------------------------------------------------------------------------------------------------------|----------------|-------------------------------|-------------------------------|---------------------------|---------------------------|----------------------------|----------------------------|
| $\lambda_0 \neq \lambda_1; \mu_0 \neq \mu_1; q_{01} \neq q_{10}$                | 6              | -358.759        | 729.952        | -0.048                                                                                                          | 0.141          | 1.079                         | 2.956                         | 0.965                     | 2.037                     | 0.064                      | 0.227                      |
|                                                                                 |                |                 |                | * the lowest AIC is the model with 6 parameters, but it has a small $\Delta AIC$ as compared to simplest models |                |                               |                               |                           |                           |                            |                            |
| <b>Fruit type (0: capsule; 1: berry)</b>                                        |                |                 |                |                                                                                                                 |                |                               |                               |                           |                           |                            |                            |
| <b>Model</b>                                                                    | <b>N<br/>P</b> | <b>LogL</b>     | <b>AICc</b>    | <b><math>\Delta AIC</math></b>                                                                                  | <b>P (LRT)</b> | <b><math>\lambda_0</math></b> | <b><math>\lambda_1</math></b> | <b><math>\mu_0</math></b> | <b><math>\mu_1</math></b> | <b><math>q_{01}</math></b> | <b><math>q_{10}</math></b> |
| Null model<br>( $\lambda_0 = \lambda_1; \mu_0 = \mu_1; q_{01} = q_{10}$ )       | 3              | -319.636        | 645.395        | 22.804                                                                                                          | 0.99           | 2.815                         | 2.815                         | 2.469                     | 2.469                     | 0.037                      | 0.037                      |
| $\lambda_0 \neq \lambda_1; \mu_0 = \mu_1; q_{01} = q_{10}$                      | 4              | -310.059        | 628.324        | 5.733                                                                                                           | 0.99           | 1.954                         | 2.666                         | 1.692                     | 1.692                     | 0.024                      | 0.024                      |
| $\lambda_0 = \lambda_1; \mu_0 \neq \mu_1; q_{01} = q_{10}$                      | 4              | -310.192        | 628.588        | 5.998                                                                                                           | 0.99           | 2.280                         | 2.280                         | 2.044                     | 1.186                     | 0.018                      | 0.018                      |
| $\lambda_0 = \lambda_1; \mu_0 = \mu_1; q_{01} \neq q_{10}$                      | 4              | -319.270        | 646.745        | 24.155                                                                                                          | 0.99           | 2.814                         | 2.814                         | 2.467                     | 2.467                     | 0.030                      | 0.052                      |
| $\lambda_0 \neq \lambda_1; \mu_0 \neq \mu_1; q_{01} = q_{10}$                   | 5              | -309.859        | 630.028        | 7.437                                                                                                           | 0.99           | 2.055                         | 2.498                         | 1.804                     | 1.460                     | 1.460                      | 1.460                      |
| $\lambda_0 \neq \lambda_1; \mu_0 = \mu_1; q_{01} \neq q_{10}$                   | 5              | -307.565        | 625.438        | 2.848                                                                                                           | 0.99           | 1.937                         | 2.715                         | 1.701                     | 1.701                     | 0.014                      | 0.067                      |
| <b><math>\lambda_0 = \lambda_1; \mu_0 \neq \mu_1; q_{01} \neq q_{10}</math></b> | <b>5</b>       | <b>-306.141</b> | <b>622.591</b> | <b>0</b>                                                                                                        | <b>Best</b>    | <b>2.220</b>                  | <b>2.220</b>                  | <b>2.018</b>              | <b>1.017</b>              | <b>0.009</b>               | <b>0.081</b>               |
| $\lambda_0 \neq \lambda_1; \mu_0 \neq \mu_1; q_{01} \neq q_{10}$                | 6              | -305.982        | 624.400        | 1.809                                                                                                           | 0.573          | 2.364                         | 2.111                         | 2.170                     | 0.875                     | 0.008                      | 0.085                      |
| <b>Pollinator class (0: invertebrate; 1: vertebrate)</b>                        |                |                 |                |                                                                                                                 |                |                               |                               |                           |                           |                            |                            |
| <b>Model</b>                                                                    | <b>N<br/>P</b> | <b>LogL</b>     | <b>AICc</b>    | <b><math>\Delta AIC</math></b>                                                                                  | <b>P (LRT)</b> | <b><math>\lambda_0</math></b> | <b><math>\lambda_1</math></b> | <b><math>\mu_0</math></b> | <b><math>\mu_1</math></b> | <b><math>q_{01}</math></b> | <b><math>q_{10}</math></b> |
| Null model<br>( $\lambda_0 = \lambda_1; \mu_0 = \mu_1; q_{01} = q_{10}$ )       | 3              | -290.715        | 587.553        | 37.753                                                                                                          | 0.99           | 2.847                         | 2.847                         | 2.501                     | 2.501                     | 0.013                      | 0.013                      |
| <b><math>\lambda_0 \neq \lambda_1; \mu_0 = \mu_1; q_{01} = q_{10}</math></b>    | <b>4</b>       | <b>-270.798</b> | <b>549.800</b> | <b>0</b>                                                                                                        | <b>Best</b>    | <b>0.998</b>                  | <b>1.943</b>                  | <b>0.970</b>              | <b>0.970</b>              | <b>0.011</b>               | <b>0.011</b>               |
| $\lambda_0 = \lambda_1; \mu_0 \neq \mu_1; q_{01} = q_{10}$                      | 4              | -272.780        | 553.766        | 3.966                                                                                                           | 0.99           | 2.051                         | 2.051                         | 2.045                     | 1.144                     | 0.007                      | 0.007                      |
| $\lambda_0 = \lambda_1; \mu_0 = \mu_1; q_{01} \neq q_{10}$                      | 4              | -290.087        | 588.379        | 38.579                                                                                                          | 0.99           | 2.844                         | 2.844                         | 2.498                     | 2.498                     | 0.001                      | 0.015                      |
| $\lambda_0 \neq \lambda_1; \mu_0 \neq \mu_1; q_{01} = q_{10}$                   | 5              | -269.357        | 549.023        | -0.777                                                                                                          | 0.089          | 0.351                         | 2.093                         | 0.255                     | 1.155                     | 1.155                      | 1.155                      |

|                                                                  |   |          |         |                                                                                                                 |       |       |       |       |       |       |       |
|------------------------------------------------------------------|---|----------|---------|-----------------------------------------------------------------------------------------------------------------|-------|-------|-------|-------|-------|-------|-------|
| $\lambda_0 \neq \lambda_1; \mu_0 = \mu_1; q_{01} \neq q_{10}$    | 5 | -270.113 | 550.534 | 0.734                                                                                                           | 0.242 | 0.990 | 1.952 | 0.968 | 0.968 | 0.007 | 0.021 |
| $\lambda_0 = \lambda_1; \mu_0 \neq \mu_1; q_{01} \neq q_{10}$    | 5 | -271.390 | 553.089 | 3.289                                                                                                           | 0.99  | 1.992 | 1.992 | 1.998 | 1.037 | 0.004 | 0.022 |
| $\lambda_0 \neq \lambda_1; \mu_0 \neq \mu_1; q_{01} \neq q_{10}$ | 6 | -269.330 | 551.094 | 1.294                                                                                                           | 0.23  | 0.377 | 2.083 | 0.288 | 1.140 | 0.016 | 0.019 |
|                                                                  |   |          |         | * the lowest AIC is the model with 5 parameters, but it has a small $\Delta AIC$ as compared to simplest models |       |       |       |       |       |       |       |

Best-fitting model, as determined via a combination of the Aikake Information Criterion and likelihood ratio tests (LRT), is in red and bold text. The best model is first identified with the lowest AICc and then compared to other models with  $\Delta AIC$  and LRT. The best-fitting models show that there is higher net diversification in the Andes (vs. extra-Andes), at high elevation (vs. low elevation), in berry-producing lineages (vs. capsular lineages), and in vertebrate-pollinated lineages (vs. invertebrate-pollinated lineages). Our second and third best models in each scenario also support these conclusions.  $\lambda$  = speciation rate (in events/Ma/lineage);  $\mu$  = extinction rate (in events/Ma/lineage);  $q$  = transition rate between states; NP, number of parameter in each model.

**Table S6. Correlated evolution of binary traits using BayesTraits.**

| <b>Maximum Likelihood</b> |                       |                         |                    |    |              |
|---------------------------|-----------------------|-------------------------|--------------------|----|--------------|
| <b>Pair of Characters</b> | <b>LH (Dependent)</b> | <b>LH (Independent)</b> | $\chi^2$ statistic | df | p-value      |
| Pollination: Fruit        | -56.583684            | -60.354574              | 7.54178            | 4  | 0.109881     |
| Pollination: Elevation    | -104.072122           | -107.581998             | 7.019752           | 4  | 0.1348481    |
| Pollination: Andean       | -88.546479            | -92.452286              | 7.811614           | 4  | 0.09872793   |
| Fruit: Elevation          | -130.009089           | -133.796692             | 7.575206           | 4  | 0.1084384    |
| Fruit: Andean             | -118.2341643          | -122.1769823            | 7.8856359          | 4  | 0.09585848   |
| Elevation: Andean         | -159.696796           | -168.894404             | 18.395216          | 4  | 0.001032828* |

| <b>Bayesian Inference</b> |                                  |                                    |                     |
|---------------------------|----------------------------------|------------------------------------|---------------------|
| <b>Pair of Characters</b> | <b>Harmonic Mean (Dependent)</b> | <b>Harmonic Mean (Independent)</b> | <b>Bayes Factor</b> |
| Pollination: Fruit        | -66.279838                       | -64.657858                         | 3.24396             |
| Pollination: Elevation    | -111.382757                      | -111.797966                        | -0.830418           |
| Pollination: Andean       | -98.023314                       | -97.954698                         | 0.137232            |
| Fruit: Elevation          | -138.288508                      | -138.146294                        | 0.284428            |
| Fruit: Andean             | -127.542706                      | -126.737234                        | 1.610944            |
| Elevation: Andean         | -229.079744                      | -172.277752                        | 113.603984*         |

Results of likelihood ratio test (above) and Bayes factor of harmonic means from MCMC (below) for the correlated evolution of 6 pairs of binary characters. Tests were performed by comparing fit of a dependent v. independent model of trait evolution in BayesTraits. Asterisks mark traits whose evolution was found to be significantly correlated. LH: log-likelihood; df: degrees of freedom.

**Table S7. Model comparison for the two diversity-dependence analyses presented, with mean parameter estimates for each model.**

| <b>Diversity Dependence</b>                       |                           |           |             |             |                             |                         |          |
|---------------------------------------------------|---------------------------|-----------|-------------|-------------|-----------------------------|-------------------------|----------|
| <b>Model</b>                                      | <b>Mode of dependency</b> | <b>NP</b> | <b>logL</b> | <b>AICc</b> | <b><math>\lambda</math></b> | <b><math>\mu</math></b> | <b>K</b> |
| $\lambda$ depends on diversity (no extinction)    | Exponential variation     | 2         | -1056.369   | 2108.677    | 0.05975                     | -                       | 31190.11 |
| $\lambda$ depends on diversity and $\mu$ constant | Exponential variation     | 3         | -958.0664   | 1910.01     | 0.07683                     | 3.041e-05               | 5873.402 |

Both models show that the group has not reached its ecological carrying capacity, suggesting that there currently is no limit to species diversity.  $\lambda$  = speciation rate (in events/Ma/lineage);  $\mu$  = extinction rate (in events/Ma/lineage); K = carrying capacity; NP, number of parameter in each model.
